1           A mathematical framework for dissecting normative foundations of  
2                                   objective-driven conservation decisions  
3  
4

5           Guillaume Latombe<sup>1,2\*</sup>, Bernd Lenzner<sup>1</sup>, Anna Schertler<sup>1</sup>, Stefan Dullinger<sup>3</sup>, Michael Glaser<sup>1</sup>,  
6                                   Ivan Jarić<sup>4,5</sup>, Aníbal Pauchard<sup>6,7</sup>, John R. U. Wilson<sup>8,9</sup>, Franz Essl<sup>1,9</sup>  
7  
8

9           <sup>1</sup>BioInvasions, Global Change, Macroecology – Group, Department of Botany and Biodiversity  
10           Research, University Vienna, Rennweg 14, 1030 Vienna, Austria

11           <sup>2</sup>Institute of Evolutionary Biology, The University of Edinburgh, King’s Buildings, Edinburgh  
12           EH9 3FL, United Kingdom

13           <sup>3</sup>Division of Conservation Biology, Vegetation and Landscape Ecology, Department of Botany  
14           and Biodiversity Research, University of Vienna, Rennweg 14, 1030 Vienna, Austria

15           <sup>4</sup>Biology Centre of the Czech Academy of Sciences, Institute of Hydrobiology, Na Sádkách  
16           702/7, 370 05 České Budějovice, Czech Republic

17           <sup>5</sup>University of South Bohemia, Faculty of Science, Department of Ecosystem Biology,  
18           Branišovska 1645/31a, 370 05 České Budějovice, Czech Republic

19           <sup>6</sup>Laboratorio de Invasiones Biológicas (LIB), Facultad de Ciencias Forestales, University of  
20           Concepcion Victoria 631, Concepción, Chile

21           <sup>7</sup>Institute of Ecology and Biodiversity (IEB), Santiago, Chile

22           <sup>8</sup>South African National Biodiversity Institute, Kirstenbosch Research Centre, Claremont 7735,  
23           South Africa

24           <sup>9</sup>Centre for Invasion Biology, Department of Botany and Zoology, Stellenbosch University,  
25           Private Bag X1, Matieland 7602, South Africa  
26  
27

28           \*Corresponding author: [latombe.guillaume@gmail.com](mailto:latombe.guillaume@gmail.com)  
29

30 **Abstract**

31

32 Perspectives in conservation are based on a variety of value systems and normative postulates.  
33 Such differences in how people value nature and its components lead to different evaluations of  
34 the morality of conservation goals and approaches, and often underlie disagreements in the  
35 formulation and implementation of environmental management policies. Specifically, whether a  
36 specific conservation decision (e.g. killing feral cats to save birds threatened with extinction) is  
37 viewed as appropriate or not can vary among people with different value systems. Here, we  
38 present a conceptual, mathematical framework that is intended to serve as a heuristic tool to  
39 clarify normative postulates in conservation approaches based on the expected consequences of  
40 management. Although it is not intended to replace more complex philosophical discursive  
41 approaches and moral reasoning, its purpose is to highlight how fundamental differences  
42 between value systems can lead to different prioritizations of available management options and  
43 offer a common ground for discussion. We compare how management decisions would likely be  
44 viewed under three different idealised value systems (ecocentric conservation, new conservation,  
45 and sentientist conservation). We illustrate the utility of the framework by applying it to case  
46 studies involving invasive alien species, rewilding, and trophy hunting. By making value systems  
47 and their consequences in practice explicit, the framework facilitates debates on contested  
48 conservation issues. Finally, we believe dissecting the normative postulates on which  
49 conservation decisions are based will facilitate understanding and addressing conservation  
50 conflicts.

51

52

53 **Keywords:** environmental management; impact; invasive alien species; moral values; rewilding;  
54 speciesism; trophy hunting

55

## 56 INTRODUCTION

57

58 The consideration of the moral relationship between humans and nature and the consequent  
59 ethical obligations for conservation is relatively recent in Western culture. Environmental ethics  
60 only emerged as an academic discipline in the 1970s (Brennan and Lo, 2016) and the concepts of  
61 values, duty, and animal welfare, are now increasingly appreciated in applied ecology and  
62 conservation (e.g. Díaz et al., 2018; Dubois et al., 2017). These concepts are complex and the  
63 formulation and implementation of environmental management policies is often associated with  
64 conflicts between different groups of stakeholders and between people with different values and  
65 interests, for example for the management of charismatic alien species (Crowley et al., 2017;  
66 Jarić et al., 2020; Redpath et al., 2013). An examination of how value systems could be explicitly  
67 accounted for in decision making could offer opportunities for better identifying conflicts,  
68 potentially helping to resolve them, and overall improve environmental management.

69

70 Value systems consider more or less inclusive communities of moral patients (the elements with  
71 intrinsic or inherent value towards which humans, considered here as the community of moral  
72 agents, are considered to have obligations; in the following, we refer to the community of moral  
73 patients as the moral community, for simplification; Table 1), ranging from humans  
74 (anthropocentrism), to further incorporate sentient beings (sentientism), living beings  
75 (biocentrism), and collectives (such as species and ecosystems; ecocentrism) (Table 1, Figure 1).  
76 The definition of moral communities can also be influenced by additional elements (such as  
77 spatial elements in the case of nativism), and, at the assessor level, by personal experience. These  
78 value systems underlie different sets of explicit or implicit normative postulates that define  
79 different conservation approaches (e.g. Soulé, 1985). If the normative postulates of different  
80 value systems differ (and excluding considerations that moral reasoning, experience, etc., may  
81 change one's value system), conflicts can arise between different groups of stakeholders whose  
82 members share common moral values (e.g. Crowley et al., 2017). In particular, conservationists  
83 who value biodiversity *per se* [as defined initially by Soulé (1985), called hereafter 'traditional  
84 conservation' (Table 1)] can be at odds with those who value biodiversity based on human  
85 welfare and economic aspects [including 'new conservation' (Kareiva and Marvier, 2012)],  
86 leading to heated debates in the literature (Doak et al., 2015; Kareiva, 2014; Soulé, 2014), or

87 with those based on animal welfare [‘conservation welfare’ (Beausoleil et al., 2018), or, to a  
88 certain extent, ‘compassionate conservation’ (Driscoll and Watson, 2019; Hayward et al., 2019;  
89 Wallach et al., 2018)].

90  
91 In the following, our aim is to conceptualize and decompose value systems in an explicit and  
92 potentially quantifiable fashion using a common mathematical framework, and to explore their  
93 repercussions for the perception of conservation management actions by stakeholders with  
94 different value systems. We argue that doing so allows for explicit comparison between these  
95 perceptions to identify sources of potential conflicts. First, we recapitulate four archetypal value  
96 systems in environmental affairs and relate them to different conservation philosophies. Since  
97 identifying commonalities in the perspectives of different parties is key in conflict management  
98 (Redpath et al., 2013), we then introduce a formal framework to conceptualise these value  
99 systems, and examine how it can be applied to clarify different perspectives. Finally, we discuss  
100 opportunities for identifying commonalities between different value systems that may enable  
101 identifying widely acceptable solutions to otherwise polarising issues.

102  
103 Here, we will focus on a Western perspective of value systems that have been internationally  
104 considered for environmental policies and the management of nature (e.g. Mace, 2014). The  
105 archetypes of value systems and of conservation approaches were chosen for their importance in  
106 the past and present literature and their clear differences, to illustrate our framework. We  
107 acknowledge this is a small part of the global diversity of value systems. It would be interesting  
108 to see if our framework could be applied to other contexts, to identify its limitations.

109

## 110 **ENVIRONMENTAL ETHICS AND CONSERVATION**

111

### 112 **From the valuation of humans to that of ecosystems: a complex spectrum of** 113 **perspectives.**

114

115 The Western perspective of moral valuation encompasses a diverse set of value systems with  
116 respect to the components of nature that form the community of moral patients. Traditionally,

117 one can distinguish at least four archetypal value systems: anthropocentrism, sentientism,  
118 biocentrism, and ecocentrism (Palmer et al., 2014; Rolston III, 2003) (Table 1; Figure 1).

119  
120 Anthropocentrism values nature by the benefits it brings to people through ecosystem services,  
121 which encompasses economic, biological, and cultural benefits humans can derive from nature  
122 (Díaz et al., 2018). One justification for anthropocentrism is that humans are (arguably) the only  
123 self-reflective moral beings, and people are therefore both the subject and object of ethics  
124 (Rolston III, 2003), therefore constituting the moral community (Table 1). In an anthropocentric  
125 system, individuals from non-human species only have value based on their benefits or  
126 disservices for humans (instrumental or non-instrumental).

127  
128 Sentientism considers that humans and all sentient animals value their life, and experience  
129 pleasure, pain, and suffering. All sentient individuals should therefore also be part of the moral  
130 community (i.e. have an intrinsic value). In this view, it is the sentience (e.g. measured through  
131 cognitive ability, Singer, 2009), rather than species themselves, that has intrinsic value.

132  
133 Biocentrism considers that life has intrinsic value. Although different perspectives on why life  
134 has value exist (see e.g. Taylor, 2011), all living organisms are valued equally for being alive,  
135 and not differently based on any other trait.

136  
137 Some ecocentric, or holistic, value systems consider that ecological collectives, such as species  
138 or ecosystems, have intrinsic value, independently from the individuals that comprise them.  
139 Species can have different values, i.e. speciesism (Table 1), and these values can be influenced  
140 by a multitude of factors, discussed in more details below.

141  
142 In practice, the separation between these different archetypes is blurry, and values given to  
143 different species may vary under the same general approach. For example, biocentrism can range  
144 from complete egalitarianism between organisms, i.e. universalism (Table 1), to a gradual  
145 valuation resembling sentientism. These four value systems can also interact with other systems  
146 that use other criteria than the intrinsic characteristics of individuals to define the moral  
147 community. For example, nativism is a system that values organisms indigenous to a spatial

148 location or an ecosystem over those that have been anthropogenically introduced. Nativism can  
149 therefore interact with any of the four systems presented above to alter the value attributed to a  
150 species in a given context. Finally, the attribution of values to individuals from different species  
151 can be deeply embedded in the individual psychologies of the assessor (Palmer et al., 2014;  
152 Waytz et al., 2019). Values and personal interests interact in making and expressing moral  
153 judgements (Essl et al., 2017). Thus, the archetypes of value systems presented above are rarely  
154 expressed in a clear and obvious fashion.

155

156 To account for the different elements that can be combined to create the concept of value, in the  
157 following, we distinguish between ‘intrinsic’, ‘inherent’, and ‘utilitarian’, value (our definitions;  
158 Table 1). Intrinsic value is the value possessed by an individual or collective as defined by one of  
159 the systems above, and is therefore independent of context. Intrinsic value is based on objective  
160 criteria (i.e. independent of the assessor), such as cognitive ability (but the choice of these  
161 criteria is subjective). This has been termed “objective intrinsic value” by others (Sandler, 2012).  
162 Inherent value is the value of an individual, species or ecosystem that results from the  
163 combination of its intrinsic value (which can be considered to be null or non-existent) and  
164 context-specific and subjective factors (note that other scholars have used ‘inherent’ differently,  
165 e.g. Regan, 2004; Taylor, 1987; here it corresponds to what has also been termed “subjective  
166 intrinsic value”; Sandler, 2012). These factors include charisma (Courchamp et al., 2018; Jarić et  
167 al., 2020), anthropomorphism (Tam et al., 2013), organismic complexity (Proença et al., 2008),  
168 neoteny (Stokes, 2007), cultural importance (Garibaldi and Turner, 2004), religion (Bhagwat et  
169 al., 2011), or parochialism (Waytz et al., 2019), or more generally the relationship between  
170 humans and elements of nature (Chan et al., 2016) (Table 1). For example, some alien species  
171 that did not have any inherent value prior to their introduction have been incorporated in local  
172 cultures, therefore providing them a novel and higher inherent value such as horses being linked  
173 to a strong local cultural identity in some parts of the USA (Rikoon, 2006). Inherent value can  
174 often be considered to be fixed at the time scale of a management action, but can nonetheless  
175 vary over short time scales in some situations (see the example of the Oostvaardersplassen nature  
176 reserve below). Utilitarian value is determined only from an anthropocentric perspective. It is  
177 context-dependent and can change rapidly, for example in the case of commercial exploitation.

178

179 **Moral valuation and the management of nature.**

180

181 Conservation practices can historically be divided into three main categories, closely related to  
182 specific systems of moral valuation (Mace, 2014). At one extreme, a ‘nature for itself’ (Table 1)  
183 view mostly excludes humans from the assessment of the efficacy of conservation management  
184 actions. This ecocentric perspective is the foundation of traditional conservation as defined by  
185 Soulé (1985), and relies on the four following normative postulates: “diversity of organisms is  
186 good,” “ecological complexity is good,” “evolution is good,” and “biotic diversity has intrinsic  
187 value” (Soulé, 1985). It historically underlies widely-used conservation tools, like the IUCN Red  
188 List of Threatened Species (IUCN, 2019), in which threat categories are defined in terms of  
189 probability of extinction (Mace and Lande, 1991) (i.e. a species-level criterion aimed at  
190 preserving biodiversity). Ecocentrism is often not limited to the valuation of species, but can  
191 encompass wider collectives, i.e. assemblages of species and functions, or ecosystems. This other  
192 perspective is captured, for example, by the IUCN Red List of Ecosystems (IUCN-CEM, 2016),  
193 and it is strongly reflected in international conservation-legislation such as the Convention on  
194 Biological Diversity (UNEP CBD, 2010). In the following we refer to traditional conservation as  
195 an ecocentric value system where species are intrinsically valuable (nature for itself; Figure 1)  
196 and humans are mostly excluded from management. We acknowledge that this is an archetypal  
197 view of traditional conservation, and is used here simply for illustrative purposes.

198

199 By contrast the anthropocentric ‘nature for people’ perspective (Mace, 2014) values species and  
200 ecosystems only to the extent that they contribute to the wellbeing of humans. These values  
201 encompass ecosystem services that help sustain human life (Bolund and Hunhammar, 1999) or  
202 economic assets (Fisher et al., 2008), and can rely on the assessment of species and ecosystem  
203 services in terms of their economic value (Costanza et al., 1997), which can be considered as the  
204 most general form of utilitarian value, and has also been termed economism (Norton, 2000). The  
205 ‘nature for people’ perspective can nonetheless incorporate additional measures linked to human  
206 wellbeing, such as poverty alleviation or political participation. This more holistic measure of  
207 impacts on humans is exemplified by ‘new conservation’, also termed ‘social conservation’  
208 (Doak et al., 2015; Kareiva, 2014; Miller et al., 2011) (Table 1). It has been argued that such  
209 an anthropocentric perspective will, by extension, help and even be necessary to maximize the

210 conservation of nature (Kareiva and Marvier, 2012). This view was first laid out as the  
211 convergence hypothesis (Norton, 1986). It is nonetheless important to note that the exact set of  
212 normative postulates proposed by the proponents of new conservation is not clearly defined  
213 (Miller et al., 2011), leading to differences of interpretation and heated debates in recent years  
214 (Doak et al., 2015; Kareiva, 2014; Kareiva and Marvier, 2012; Soulé, 2014).

215  
216 Environmental pragmatism (Katz and Light, 2013; Norton, 1984), proposed the notion of weak  
217 anthropocentrism, in which the value of elements of the environment is not only utilitarian, but  
218 defined by the relationship between humans and nature (Chan et al., 2016), and therefore is  
219 influenced by context and people’s experience (see also the notion of inherent value described  
220 above). More recently, the necessity to account for the interdependence between the health of  
221 nature and human wellbeing (i.e. ‘people and nature’ Mace, 2014) has been advocated in the  
222 United Nations Sustainable Development Goals (Weitz et al., 2018). Similarly, “nature-based  
223 solutions” is an approach endorsed by the IUCN, which aims at protecting, sustainably  
224 managing, and restoring, natural or modified ecosystems, to simultaneously provide human  
225 wellbeing and biodiversity benefits (Cohen-Shacham et al., 2016). The ‘One Health’ approach,  
226 endorsed by the Food and Agriculture Organization, the World Health Organization, and the  
227 World Organisation for Animal Health also acknowledges the interdependence between the state  
228 of ecosystems and human health and zoonoses (Gibbs, 2014). The difference between people and  
229 nature and new conservation approaches therefore lies in the fact that it merges anthropocentric  
230 and ecocentric systems, rather than considering that the latter will be addressed by focusing on  
231 the former (see Section “Nature despite/for/and people” below for details).

232  
233 Finally, although the animal right movement, based on sentientism, originated in the 19<sup>th</sup> century  
234 (Salt, 1894), it has not, to our knowledge, been formally considered in conservation approaches  
235 until recently. Two main approaches can be found in the literature. Conservation welfare  
236 (Beausoleil et al., 2018) is a consequentialist perspective that considers conservation under the  
237 prism of animal welfare maximisation. Compassionate conservation (Ramp and Bekoff, 2015;  
238 Wallach et al., 2018), also incorporates animal sentience, but from a virtue ethics perspective.  
239 Although conservation welfare aims at aligning with more traditional conservation approaches  
240 presented above (Beausoleil et al., 2018), compassionate conservation appears to be set on



241 different values and proposes, for example, to incorporate emotion to provide insight in  
242 conservation (Batavia et al., 2021).

243

## 244 **FRAMING MORAL VALUES FOR OBJECTIVE-DRIVEN** 245 **CONSERVATION**

246

### 247 **Formulation of a mathematical framework.**

248

249 Many of the conflicts in conservation are grounded in the failure to identify and formalize  
250 differences in world views, which contain elements of the four archetypes presented above,  
251 influenced by cultural norms, economic incentives etc. (Essl et al., 2017). Here, we propose a  
252 mathematical formulation as a method to clarify moral discourses in conservation, based on a  
253 consequentialist perspective. We therefore consider an objective-driven type of conservation. Our  
254 purpose is not to argue about the relevance of consequentialism vs. deontology, or on the place of  
255 virtue ethics in conservation. Rather, we consider that, from a management perspective,  
256 conservation necessarily includes objective-driven considerations. A better understanding of how  
257 and why objectives can differ between stakeholders is therefore useful to anticipate and manage  
258 potential conflicts. In particular, we argue that defining concepts as mathematical terms can  
259 make differences in value systems and their normative postulates more transparent to all  
260 participants of the discourse. Doing so can help to identify and facilitate the discussion of shared  
261 values and incompatibilities between different environmental policies and management options  
262 (Miller et al., 2011), and contribute to manage conflicts (Redpath et al., 2013). In a similar vein,  
263 Parker et al. (1999) proposed a mathematical framework for assessing the environmental impacts  
264 of alien species. This work was highly influential in the conceptualisation of biological invasions  
265 (being cited over 2,000 times until April 2021 according to Google Scholar), rather than by its  
266 direct quantitative application. We also acknowledge that this approach has specific limitations,  
267 which are discussed below.

268

269 Our mathematical formalisation conceptualises the consequences of environmental management  
270 actions. We argue that it can account for different value systems, including the anthropocentric,  
271 sentientist, biocentric and species-based ecocentric systems (see Appendix S1 for an extension to

272 ecocentrism beyond species and considering wider collectives, i.e. ecosystems), while also  
273 accounting for cultural and personal contexts. These consequences  $C$  can be conceptualised as a  
274 combination of the impact of an action on the different species or individuals involved and the  
275 value given to said species and individuals under different value systems as follows:

$$276 \quad C = \sum_{species\ s} \bar{I}_s \times V_s \times N_s^a \quad \text{Eq.1}$$

277  
278 where  $\bar{I}_s$  is a function (e.g. mean, maximum, etc.) of the impact (direct and indirect) resulting  
279 from the management action on all individuals of species  $s$ ,  $V_s$  is the inherent value attributed to  
280 an individual of species  $s$  (as described above),  $N_s$  is the abundance of species  $s$ , and  $a$   
281 determines the importance given to a species based on its abundance or rarity (and enables to  
282 account for the importance of a species rather than an individual, see below). The unit of  $C$   
283 depends on how other parameters are defined, which themselves depend on the value system  
284 considered. In summary, the higher the impact on species with high values, the higher the  
285 consequences.

286  
287  
288 Inherent value  $V_s$  can have a monetary unit, or be unit-less, for example, depending on how it is  
289 defined. Our definition of inherent value here is extremely broad, as the purpose of this work is  
290 not to define what such value should be. Rather, it is flexible to encompass multiple perspectives  
291 and the subjectivity of the assessor, and can be based on intrinsic, utilitarian or relational values  
292 (Chan et al., 2016).

293  
294 The parameter  $a$  can take both positive and negative values. A value of 1 means that  
295 consequences are computed over individuals. If all values  $V_s$  were the same,  $a = 1$  implies that all  
296 individuals in the moral community (Table 1) weigh the same when computing  $C$ , irrespective of  
297 the species they belong to. This is typical of individual-centred value systems, i.e. sentientism,  
298 and biocentrism, whose characteristics (sentience and life) are defined at the individual level  
299 (note that since anthropocentrism only includes individuals from one species as moral patients,  
300 the term  $N_s^a$  is irrelevant in this case). As a result, impacts on larger populations would weigh  
301 more on the consequences. As  $a$  decreases towards 0, the correlation between the value of a  
302 species and its abundance decreases. For  $a = 0$ , the consequence of a management action

303 becomes abundance-independent. For  $a < 0$ , rare species would be valued higher than common  
304 species (or the same impact would be considered to be higher for rare species), for example due  
305 to the higher risk of extinction.  $a > 1$  would give a disproportionate weight to abundant species,  
306 which are often important for providing ecosystem services (Gaston, 2010).

307

308 The impact  $I_s$  is computed at the individual level. It can be limited to the probability of death of  
309 individuals or changes in per capita recruitment rate, thus allowing to compute a proxy for  
310 extinction risk if  $a \leq 0$ , but can also include animal welfare, biophysical states, etc. Different  
311 measures of impact can be considered under a same system of value, in which case Eq.1 should  
312 be applied to each one separately (see section “Application of the mathematical framework”  
313 below for details).  $I_s$  can only encompass the direct impact of a management action (in a narrow  
314 view that only the direct impact of humans, i.e. the moral agents, should be considered, and that  
315 the direct impacts from non-moral agents should not be considered), but also its indirect impact  
316 resulting from biotic interactions (considering that, in the context of management and therefore  
317 human actions, these indirect impacts are ultimately the result of the actions of the moral agents).  
318 One would therefore need to define a baseline corresponding to either i) the lowest possible  
319 measurable level of impact (e.g. being alive if death is the only measure of impact, or no sign of  
320 disease and starvation for biophysical states; this would obviously be more complicated for  
321 welfare), so that  $I$  would only be positive; ii) the current state of the system, in which case  
322 impacts could be positive or negative for different species; or iii) the past state of a system, for  
323 example prior to the introduction of alien species (see Rohwer and Marris, 2021 for a discussion  
324 on the notion of ecosystem integrity). The duration over which to measure such impact should  
325 also be determined. The exact quantification of impact will be influenced by different value  
326 systems and personal subjectivity. Some impacts may be considered incommensurable (Essl et  
327 al., 2017), therefore falling out of the scope of the framework. The average impact  $\bar{I}_s$  over all  
328 considered individuals from a species could be used as a measure at the species-level, as  
329 different individuals may experience different impacts, if the management action targets only  
330 part of a given population. Using the average impact is not without shortcomings though, since it  
331 does not account for potential discrepancies in impacts suffered by different individuals in a  
332 population. In other words, to which point do “the needs of the many outweigh the needs of the  
333 few” (Littmann, 2016)? Other measures such as the maximum impact experienced by

334 individuals, or more complex functions accounting for the variability of impacts and values  
335 across individuals of a same species may also be used, to account for potential disproportionate  
336 impacts on a subset of the considered individuals. Under anthropocentric perspectives, impacts  
337 are influenced by the utilitarian values of species.

338

### 339 **Application of the mathematical framework.**

340

341 For each measure of impact and each system of values, Equation 1 produces relative rather than  
342 absolute values. The values of consequences  $C$  of a management action under different value  
343 systems and measure of impact cannot be directly compared with each other, because the unit  
344 and range of values of  $C$  can vary between value systems. Instead, Equation 1 can be used to  
345 rank a set of management actions for each value system or measure of impact based on their  
346 assessed consequences, to identify management actions representing consensus, compromises or  
347 conflicts amongst value systems.

348

349 If different types of impacts are considered simultaneously under a value system, Equation 1  
350 might rank management actions differently for these different impacts under the same system of  
351 moral values, potentially leading to moral dilemmas. Similarly, some actions might not follow  
352 moral norms compared to others despite having more desirable consequences. For example,  
353 killing individuals may be considered less moral, but more efficient to preserve biodiversity or  
354 ecosystem services than using landscape management. Solving these moral dilemmas is  
355 complex, and beyond the scope of this publication, but approaches such as multi-criteria decision  
356 analyses (MCDA, Huang et al., 2011) may offer avenue to do so (Goetghebeur and Wagner,  
357 2017). Similarly, environmental conflicts will likely emerge when comparing the rankings  
358 generated by Equation 1 under different value systems considering different distributions of  
359 values, and different measures of impact. MCDA (Wittmer et al., 2006) and operational research  
360 (Kunsch et al., 2009), have also been proposed to resolve such conflicts. We nonetheless argue  
361 that, regardless of the capacity to resolve environmental conflicts (or moral dilemmas), being  
362 able to understand where these conflicts emerge from in Equation 1 can only be beneficial for  
363 decision making.

364

365

366 In the following, we show how, despite the difficulty to quantify the variables described above,  
367 this framework can be used as a heuristic tool to capture the implications of considering different  
368 value systems for determining the appropriateness of a conservation action, and to better  
369 understand conservation disputes.

370

## 371 **NATURE DESPITE/FOR/AND PEOPLE**

372

373 Over the past decade there has been some debate between proponents of traditional conservation,  
374 and those of new conservation (Table 1), as each group assumes different relationships between  
375 nature and people. Here, we show how the formal conceptualisation of Equation 1 could help  
376 clarifying the position of the new conservation approach in response to its criticisms (Kareiva,  
377 2014).

378

### 379 **Nature despite people and traditional conservation**

380

381 Traditional conservation is based on an ecocentric value system and seeks to maximize diversity  
382 of organisms, ecological complexity, and to enable evolution (Soulé, 1985). For simplification,  
383 we will consider an extreme perspective of traditional conservation, championed by ‘fortress  
384 conservation’ (Büscher, 2016; Siurua, 2006), i.e. excluding humans from the moral community.  
385 To capture these aspects, consequences  $C$  in Equation 1 can be more specifically expressed as  
386 follows:

387

$$388 \quad C = \sum_{\text{species } s \text{ (excluding humans)}} \bar{I}_s \times V_s \times N_s^{a < 0} \quad \text{Eq. 2}$$

389

390 Assigning a stronger weight to rare species ( $a < 0$ ) accounts for the fact that rare species are  
391 more likely to go extinct, decreasing the diversity of organisms. Evolution and ecological  
392 complexity are not explicitly accounted for in Equation 2. To do so, one may adapt Equation 2  
393 and consider lineages or functional groups instead of species as the unit over which impacts are  
394 aggregated.

395

396 **Nature for people and new conservation**

397

398 New conservation considers that many stakeholders (“resource users”, Kareiva, 2014) tend to  
399 have an anthropocentric value system, and that conservation approaches that do not incorporate  
400 such a perspective will likely not succeed at maximizing diversity of organisms (Kareiva, 2014;  
401 Kareiva and Marvier, 2012). Under anthropocentrism, species are only conserved due to their  
402 utilitarian value, i.e. their effect on  $I$  for humans, rather than based on an inherent value  $V$ .  
403 Different groups of stakeholders are likely to be impacted differently (e.g. different monetary  
404 benefits / losses), and we propose the following extension of Equation 1 to account for this  
405 variability:

406

$$407 \quad C = \sum_{\text{stakeholders } t} \bar{I}_t \times V_t \times N_t \quad \text{Eq.3}$$

408

409 where  $\bar{I}_t$  is the average impact of management on the group of stakeholders  $t$ , including indirect  
410 impacts through the effect of management of non-human species,  $V_t$  is the value of the group of  
411 stakeholders  $t$ , and  $N_t$  is its abundance. Note that including inherent values  $V_t$  in Equation 3 does  
412 not imply that we consider that different humans should be valued differently, but that is a view  
413 that some people have, and this needs to appear here to capture the full spectrum of perceived  
414 consequences of a management action.

415

416 New conservation holds an ambiguous perspective, stating that it should make “sure people  
417 benefit from conservation”, while at the same time does not “want to replace biological-diversity  
418 based conservation with a humanitarian movement” (Kareiva, 2014). Using our framework, we  
419 interpret this as considering that one can design management actions that minimize consequences  
420  $C$  under both Equations 2 and 3 (i.e. a mathematical expression of the convergence hypothesis;  
421 Norton, 1986). The link between biodiversity and ecosystem services is strongly supported, even  
422 if many unknowns remain (Cardinale et al., 2012; Chivian and Bernstein, 2008), implying that  
423 high biodiversity can indeed support the provision of ecosystem services to humans. Such an  
424 approach will necessarily distinguish between “useful” species and others, and impacts will be  
425 perceived differently by different groups of stakeholders. Considering multiple types of impacts  
426 (economic benefits/losses, access to nature, health, etc.) while accounting for cultural

427 differences, would increase the pool of useful species (comparing the resulting equation outputs  
428 using, for example, MCDA). The outcome of the two approaches would then potentially be more  
429 aligned with each other. This broad utilitarian perspective is captured in the most recent  
430 developments of new conservation approaches, which consider a wide range of nature  
431 contributions to people, rather than just ecosystem services (Díaz et al., 2018).

432

### 433 **People and nature**

434

435 People and nature views seek to simultaneously benefit human wellbeing and biodiversity. Under  
436 this perspective, Equations 2 and 3 should therefore be combined in a single approach, for  
437 example using MCDA (Huang et al., 2011), to capture a more diverse set of value systems than  
438 Equations 2 and 3 alone, even if the two approaches generate divergent results.

439

440 We expressed traditional and new conservation with Equations 2 and 3, which correspond to  
441 extreme interpretations of these two approaches (excluding humans or considering specific  
442 utilities of species). Doing so illustrates how our mathematical framework can capture in an  
443 explicit fashion the pitfalls of failing to explicitly define normative postulates for conservation  
444 approaches. As a result, Equations 2 and 3 will likely generate conflicting results in the ranking  
445 of different management actions, especially if few types of impacts are considered. The debates  
446 over new conservation have taken place in a discursive fashion, which has not provided a clear  
447 answer to the values defended by this approach (Doak et al., 2015; Kareiva, 2014; Soulé, 2014).  
448 It has therefore been argued that the normative postulates of new conservation need to be more  
449 explicitly defined (Miller et al., 2011). Our framework could help doing so, by being more  
450 explicit about how new conservation would be defined relative to the traditional conservation  
451 and the people and nature perspective through the addition of specific terms to Equation 3 and a  
452 thorough comparison of the resulting equations. In particular, it would be interesting to explore,  
453 if inherent values are attributed to different species under a new conservation approach, how  
454 these values are determined compared to a traditional conservation approach (e.g. relational vs.  
455 intrinsic value; Chan et al., 2016) and how their distributions differ.

456

## 457 **THE CASE OF ANIMAL WELFARE**

458

459 The question of if and how animal welfare should be integrated into conservation practice is  
460 increasingly debated (e.g. Hampton and Hyndman, 2018). Recently, conservation welfare (Table  
461 1) has proposed to consider both the “fitness” (physical states) and “feelings” (mental  
462 experiences) of non-human individuals in conservation practice (Beausoleil et al., 2018). Based  
463 on virtue ethics rather than consequentialism, compassionate conservation (Table 1) also  
464 emphasises animal welfare and is based on the “growing recognition of the intrinsic value of  
465 conscious and sentient animals” (Wallach et al., 2018). It opposes the killing of sentient invasive  
466 alien species; the killing of sentient native predators threatening endangered species; or the  
467 killing of sentient individuals from a given population to fund broader conservation goals.

468

469 Despite the near-universal support of conservation practitioners and scientists for compassion  
470 towards wildlife and ensuring animal welfare (e.g. Hayward et al., 2019; Oommen et al., 2019;  
471 Russell et al., 2016), compassionate conservation has sparked vigorous responses (Driscoll and  
472 Watson, 2019; Griffin et al., 2020; Hampton et al., 2018; Hayward et al., 2019; Oommen et al.,  
473 2019). Amongst the main criticisms of compassionate conservation is that the absence of action  
474 can result in unintended detrimental effects and increased suffering for individuals of other or the  
475 same species (including humans), as a result of altered biotic interactions across multiple trophic  
476 levels, i.e. “not doing anything” is an active choice that has consequences (Table 2). However,  
477 since compassionate conservation is not based on consequentialism, it uses different criteria to  
478 assess the appropriateness of conservation actions (but see Wallach et al., 2020 for responses to  
479 some criticisms). Our purpose here is not to discuss the relevance or irrelevance of virtue ethics  
480 for conservation (see Griffin et al., 2020 for such criticism). Instead, we propose discussing  
481 animal welfare from the perspective of consequentialism (Hampton et al., 2018), i.e. more  
482 aligned with the approach of conservation welfare (Beausoleil et al., 2018), and to show how it  
483 may be aligned with or oppose the traditional and new conservation approaches.

484

### 485 **A mathematical conceptualisation of animal welfare**

486

487 A consequentialist, sentientist perspective aims at maximizing happiness, or conversely  
488 minimising suffering, for all sentient beings, an approach also termed ‘utilitarianism’ (Singer,



489 1980; Varner, 2008). Suffering is therefore considered as a measure of impact (or, in  
490 mathematical terms, impact is a function of suffering, which can be expressed as  $I(S_s)$  in  
491 Equation 1).

492

493 It has become widely accepted that animals experience emotions (de Waal, 2011). Emotions have  
494 been shown to be linked to cognitive processes (Boissy and Lee, 2014), which differ greatly  
495 among species (MacLean et al., 2012), and behavioural approaches have been used to evaluate  
496 and grade emotional responses (e.g. Désiré et al., 2002; but see Shriver, 2006 and Bermond et al.,  
497 2008 for different conclusions about the capacity of animals to experience suffering). We  
498 therefore postulate that the quantification of suffering is conceptually feasible in the context of  
499 the heuristic tool presented here. In a utilitarian approach, the inherent value of a species would  
500 therefore be a function of its capacity to experience emotions and suffering  $E_s$ , which can be  
501 expressed as  $V(E_s)$  instead of  $V_s$  in Equation 1.

502

503 Under these considerations for defining impact and value of species, the consequences of a  
504 conservation action can be computed as:

505

$$506 \quad C = \sum_{\text{species } s} \overline{I(S_s)} \times V(E_s) \times N_s^{a=1} \quad \text{Eq.4}$$

507

508 Although  $V(E_s)$  should be measured in an objective fashion, many factors may influence the  
509 relationship between the inherent value and the emotional capacity of a species. For example,  
510 high empathy (Table 1) from the observer will tend to make the distribution uniform, whereas  
511 anthropomorphism and parochialism (Table 1) may lead to higher rating of the emotional  
512 capacities of species phylogenetically close to humans or with which humans are more often in  
513 contact, such as pets. Finally, we assumed that  $a = 1$ , to give equal importance to any individual  
514 regardless of the abundance of its species, as suffering and wellbeing are usually considered at  
515 the individual level (Beausoleil et al., 2018).

516

517 **Assessing suffering in the presence and absence of conservation management actions**

518

519 The short-term suffering resulting from pain and directly caused by lethal management actions,  
520 such as the use of poison to control invasive alien species (Twigg and Parker, 2010) or the use of  
521 firearms and traps to cull native species threatening other native species (e.g. Proulx et al., 2016)  
522 or humans (e.g. Gibbs and Warren, 2015), is the most straightforward type of suffering that can  
523 be assessed, and is usually sought to be minimised in all conservation approaches. Suffering can  
524 have many other causes, and suffering of an individual may be assessed through a wide variety  
525 of proxies, including access to food and water, death, number of dead kin for social animals,  
526 physiological measurements of stress hormones, etc. Suffering can take various forms, and  
527 commensurability can be an issue (Table 2), making the distinction between the morality of  
528 lethal actions and non-lethal suffering complex. Non-lethal suffering can result from  
529 unfavourable environmental conditions (e.g. leading to food deprivation) and occur over long  
530 periods, while lethal actions could be carried out in a quick, non-painful fashion (e.g. Shao et al.,  
531 2018), and even lead to improved animal welfare (Wilson and Edwards, 2019), but may be  
532 deemed immoral.

533  
534 The concept of animal welfare and how to measure it is extremely complex (Beausoleil et al.,  
535 2018), and defining it precisely is beyond the scope of this study. We nonetheless advocate a  
536 conceptual approach that takes into account indirect consequences of management actions within  
537 a certain timeframe and consider uncertainty (Table 2). Direct and indirect biotic interactions  
538 may be explicitly modelled to quantify the impact on animals and their suffering. Simulation  
539 models can also make projections on how populations may change in time, accounting for future  
540 suffering.

541

#### 542 **Are traditional conservation and animal welfare compatible?**

543

544 It has been argued that sentientism and ecocentrism are not fully incompatible (Varner, 2011).  
545 The relationship between biodiversity and animal suffering can be formalised more clearly using  
546 the traditional conservation and the sentientist Equations 2 and 4, to explore if the same  
547 management action can minimize the consequences evaluated using the two equations (see also  
548 Appendix S2 for the application of the framework to theoretical cases). The main difference with  
549 the traditional vs new conservation debate here is that Equations 2 and 4 share a number of

550 species, whereas the new conservation Equation 3 only contains humans, which are excluded  
551 from Equation 2. Even though the variables of Equation 4 differ from those of Equation 2 ( $V$  and  
552  $I$  are computed differently, and the value of  $a$  is different), it is possible that these equations will  
553 vary in similar way for different management actions due to their similar structure, although this  
554 would depend on the variety of impacts on humans that are considered in Equation 3. Finally, as  
555 for the people and nature approach, the consequences of sentientist and ecocentric approaches  
556 can be evaluated in combination, as suggested by conservation welfare (Beausoleil et al., 2018),  
557 using tools such as MCDA (Huang et al., 2011; Wittmer et al., 2006).

558  
559 One issue that may be irreconcilable between ecocentric approaches such as traditional  
560 conservation and approaches based on sentientism is the fate of rare and endangered species with  
561 limited or no sentience. Under utilitarian sentientism, the conservation of non-sentient species  
562 ranks lower than the conservation of sentient species, and consequently they are not included in  
563 Equation 4. For example, endangered plant species that are not a resource for the maintenance of  
564 sentient populations would receive no attention, as there would be few arguments for their  
565 conservation. Traditional conservation would focus on their conservation, as they would have a  
566 disproportionate impact in Equation 2, due to low abundance leading to a high value for  $N^{a < 0}$ .

567  
568 Finally, it is important to note that the current body of knowledge shows that the link between  
569 biodiversity and animal welfare mentioned above especially applies to the increase of native  
570 biodiversity. Local increase of biodiversity due to the introduction of alien species may only be  
571 temporary due to extinction debt (Kuussaari et al., 2009) and often results in a reduction of  
572 ecosystem functioning (Cardinale et al., 2012). Therefore, it is important to distinguish between  
573 nativism (Table 1) and the detrimental effects of *invasive* alien species on biodiversity and  
574 ecosystem functioning and services (Bellard et al., 2016). Nativism would result in increasing the  
575 inherent value  $V_s$  of native species (Figure 1), whereas in the second case, insights from science  
576 on the impact of invasive alien species would modify the distribution  $I(S)$  rather than the  
577 distribution  $V_s$ . This can also apply to native species whose impacts on other species, such as  
578 predation, are increased through environmental changes (Carey et al., 2012).

579

## 580 **UNRESOLVED QUESTIONS AND LIMITATIONS**

581

582 This framework shares similarities with mathematical approaches used in conservation triage  
583 (Bottrill et al., 2008), but has two crucial differences. First, conservation triage is an ecocentric  
584 perspective with variables that are comparatively easy to quantify. Bottrill et al. (2008) provided  
585 an example using phylogenetic diversity as a measure of value  $V$ , and a binomial value  $b$  to  
586 quantify biodiversity benefit that can be interpreted as the presence or absence of a species (i.e.  $I$   
587  $= 1 / b$ ). Because it is ecocentric, local species abundance is not considered, which corresponds  
588 to setting  $a = 0$ . In this example, consequences ( $C$ ) in the general Equation 1 are therefore  
589 defined simply by  $V / b$ .

590

591 In contrast, our framework allows much more flexibility to encompass a range of value systems,  
592 as shown above. Given that the data needed for quantifying parameters of Equations 1 to 4  
593 related to value, impact, emotional capacity and suffering are scarce and often very difficult to  
594 measure, this framework in its current form would nonetheless be difficult to use as a  
595 quantitative decision tool to evaluate alternative management actions, contrary to triage  
596 equations. Rather, our equations decompose the question underlying many controversies around  
597 management decisions in conservation: what or who is valued, how, and by how much?

598

599 There are nonetheless a number of approaches that may be used to develop quantification  
600 schemes for the different parameters of the framework. Grading systems may be developed to  
601 assess impact and suffering based on various indicators, including appearance, physiology, and  
602 behaviour (Beausoleil et al., 2018; Broom, 1988). For assessing the value of different species,  
603 questionnaires may be used to assess how different species are valued by people, and influenced  
604 by their social and cultural background, similar to what has been done to assess species charisma  
605 (e.g. Albert et al., 2018; Colléony et al., 2017). It will nonetheless be important to acknowledge  
606 the corresponding uncertainties in the assessment of impact and value, differences in perception  
607 among societal groups for different taxa and potential shifts in perception over time (Table 2).

608

609 The second difference from conservation triage is that the latter considers additional criteria that  
610 were not addressed here, including feasibility, cost, and efficiency (including related  
611 uncertainties). The combination of these different perspectives calls for appropriate methods to

612 include them all in decision making, which can be done using MCDA (Huang et al., 2011). Here,  
613 good communication and transparency of the decision process is key to achieve the highest  
614 possible acceptance across stakeholders, and to avoid biases in public perception (see case  
615 studies below for examples).

616  
617 The issue of spatial and temporal scale also warrants consideration (Table 2). In the case of a  
618 species that may be detrimental to others in a given location but in decline globally, the spatial  
619 scale and the population considered for evaluating the terms of Equations 1 to 4 is crucial to  
620 determine appropriate management actions. Similarly, management actions may also result in a  
621 temporary decrease in welfare conditions for animals, which may increase later on (Ohl and Van  
622 der Staay, 2012), or the impacts may be manifested with a temporal lag. In that case, determining  
623 the appropriate time period over which to evaluate the terms of Equations 1 to 4 will not be  
624 straightforward. Impacts will be of different importance depending on whether they occur in the  
625 short- or long-term, especially since long-term impacts are harder to predict and involve higher  
626 uncertainty. Discount rates (Table 2) may therefore be applied, in a similar way they are applied  
627 to the future effects of climate change and carbon emissions (Essl et al., 2018), or to assess the  
628 impact of alien species (Essl et al., 2017).

629  
630 Equations 1 to 4 assume that all individuals from a given species have the same value or  
631 emotional capacities (or use the average of the value across individuals). However, intraspecific  
632 differences in value may be important for conservation. For example, reproductively active  
633 individuals contributing to population growth/recovery may be given a higher value in an  
634 ecocentric perspective. Trophy hunters might prefer to hunt adult male deer with large antlers.  
635 Intraspecific value may also vary spatially, for example between individuals in nature reserves or  
636 in highly disturbed ecosystems. Equation 1 may therefore theoretically be adapted to use custom  
637 groups of individuals with specific values within species, similar to Equation 3.

638  
639 Finally, it is crucial to account for biotic interactions in our framework to comprehensively  
640 assess the indirect impacts of management actions on different species (Table 2). Some species  
641 with low values  $V_s$  in a certain value system may be crucial for assessing the impact  $I_s$  on other  
642 species. These biotic interactions will therefore determine the time frame over which the

643 framework should be applied, as impacts on one species at a given time may have important  
644 repercussions in the future. These biotic interactions can be complex, and several tools, such as  
645 simulation models and ecological network analyses can be used to address them. Concepts such  
646 as keystone species (Mills et al., 1993) can also offer a convenient way to overcome such  
647 complexity by modifying  $V_s$  rather than  $\bar{I}_s$ . Let us assume that a management action will have a  
648 direct impact on a keystone species, which will result in indirect impacts on multiple other  
649 species with inherent values. Increasing the value of the keystone species can result in the same  
650 assessment of  $C$  as to explicitly model the biotic interactions and compute the resulting indirect  
651 impacts  $\bar{I}_s$ .

652

653

## 654 **CASE STUDIES ILLUSTRATING ETHICAL CONFLICTS IN** 655 **CONSERVATION DECISIONS**

656

657 In the following, we present three case studies where conservation actions have either failed, had  
658 adverse effects, or were controversial, and we explore how our framework can help to identify  
659 normative postulates underlying these situations. Although these case studies have been  
660 discussed at length in the articles and reports we cite, we argue that our framework helps  
661 capturing the different components of the surrounding controversies in a more straightforward  
662 and objective fashion than using a discursive and sometimes emotionally loaded language.

663

### 664 **Invasive alien species management: the case of the alien grey squirrel in Italy**

665

666 The grey squirrel (*Sciurus carolinensis*) is native to North America and was introduced in  
667 various locations in Europe during the late nineteenth and the twentieth century (Bertolino,  
668 2008). It threatens native European red squirrel (*Sciurus vulgaris*) populations through  
669 competitive exclusion, and is also a vector of transmission of squirrel poxvirus in Great Britain  
670 (Schuchert et al., 2014). Furthermore, it has wider impacts on woodlands and plantations,  
671 reducing value of tree crops, and potentially affects bird populations through nest predation  
672 (Bertolino, 2008).

673

674 Based on the impacts of the grey squirrel, an eradication campaign was implemented in 1997 in  
675 Italy, with encouraging preliminary results (Genovesi and Bertolino, 2001). However, this  
676 eradication campaign was halted by public pressure from animal rights movements. The strategy  
677 of the animal rights activists consisted in (i) humanising the grey squirrel and using emotive  
678 messages (referring to grey squirrels as “Cip and Ciop”, the Italian names of the Walt Disney  
679 “Chip and Dale” characters) and (ii) minimising or denying the effect of grey squirrel on native  
680 taxa, especially the red squirrel (Genovesi and Bertolino, 2001). In addition, the activists did not  
681 mention (iii) the difference in abundance between a small founding population of grey squirrels  
682 that could be eradicated by managers, and a large population of native red squirrels that would be  
683 extirpated or severely impacted by grey squirrels if control was not implemented.

684  
685 Genovesi & Bertolino (2001) explain that the main reason for the failure of the species  
686 management is a different perspective on primary values: the eradication approach was underlain  
687 by species valuation, following traditional conservation, whereas the animal right activists and  
688 the public were more sensitive to animal welfare. However, the application of our framework  
689 reveals some inconsistencies in the animal right activists’ arguments that could have been used to  
690 advocate for the eradication approach. Translating this situation in our framework indicates that  
691 (i) the humanisation of the grey squirrel consists of increasing the perception of its emotional  
692 capacity  $E_{gs} > E_{rs}$  (and therefore  $V(E_{gs}) > V(E_{rs})$ ), (ii) minimising the impact of the grey squirrel  
693 is equal to restricting the time scale to a short one and to likely minimising the amount of  
694 suffering  $S$  caused by grey squirrels on other species, i.e.  $S_{gs} = S_{rs}$  (and therefore  $I(S_{gs}) = I(S_{rs})$ )  
695 without management and  $S_{gs} > S_{rs}$  (and therefore  $I(S_{gs}) > I(S_{rs})$ ) under management, and (iii) not  
696 mentioning differences in species abundance corresponds to setting  $a = 0$ . Following these three  
697 points, the consequences under management  $C_m = I(S_{gs}) \times V(E_{gs}) + I(S_{rs}) \times V(E_{rs})$  are  
698 higher than without management, due to the increase in  $V(E_{gs})$  and  $I(S_{gs})$ . The application of our  
699 framework therefore allows to clarify a discourse whose perception could otherwise be altered  
700 because of techniques such as appeal to emotion.

701  
702 The framework can thus be used to provide recommendations for what the advocates for the  
703 eradication campaign would have needed to have done: i) increase the value  $E_{rs}$  of red squirrels  
704 in a similar way as what was done for grey squirrels, so that their relative values compared to

705 grey squirrels would remain the same as before the communication campaign by the animal right  
706 activists; ii) better explain the differences in animal suffering caused by the long-term presence  
707 of the grey squirrel compared to the short-term, carefully designed euthanasia protocol, which  
708 would avoid a subjective perception of the distribution of  $S$ ; and iii) highlight the differences in  
709 the number of individuals affected. The consequences would then be computed as  $C = V(E_{gs}) \times$   
710  $I(S_{gs}) \times N_{gs} + V(E_{rs}) \times I(S_{rs}) \times N_{rs}$ . In that case, assuming for simplification the same  
711 suffering through euthanasia for grey squirrels as red squirrels suffer from the grey squirrels, and  
712 the same value to individuals of each species (i.e. avoiding nativism), the mere differences  $N_{rs} >$   
713  $N_{gs}$  in abundance would lead to a higher value of  $C$  without management. This would further  
714 increase by extending the impacts of grey squirrels to other species, as mentioned above.

715

716 A more fundamental issue, however, is that in some value systems it would not be acceptable to  
717 actively kill individuals, even if that meant letting grey squirrels eliminate red squirrels over long  
718 periods of time (e.g. Wallach et al., 2018). The reluctance to support indirectly positive  
719 conservation programs is a common issue (Courchamp et al., 2017). Whether an acceptable  
720 threshold on consequences over which killing individuals could be determined through  
721 discussion would depend, in part, on the willingness of the affected parties to compromise.

722

### 723 **De-domestication: the case of Oostvaardersplassen nature reserve**

724

725 De-domestication, the intentional reintroduction of domesticated species to the wild is a recent  
726 practice in conservation that raises new ethical questions related to the unique status of these  
727 species (Gamborg et al., 2010). Oostvaardersplassen is a Dutch nature reserve where two  
728 domesticated species of large herbivores (Heck cattle, *Bos primigenius*, and konik horses, *Equus*  
729 *ferus caballus*) have been ‘rewilded’ in addition to the reintroduction of the red deer (*Cervus*  
730 *elaphus*) to act as landscape engineers by grazing (ICMO2, 2010). The populations increased  
731 rapidly, as natural predators are missing and population regulation was not conducted, as a result  
732 of a ‘non-intervention-strategy’. The project was widely criticized when a considerable number  
733 of individuals died from starvation during a harsh winter, resulting in the introduction of  
734 population reduction by culling weak animals in order to prevent starvation (other approaches,



735 such as the reintroduction of large predators were discarded due to lack of experience and too  
736 many uncertainties in efficiency, ICMO2, 2010).

737

738 From a traditional conservation perspective, disregarding animal welfare and focusing on species  
739 diversity and ecological restoration, the project was a success. The introduction of the three  
740 herbivore species led to sustainable populations (despite high winter mortality events), and  
741 ensured stability of bird populations without the need for further interventions (ICMO2, 2010),  
742 i.e. the conditions of many species were improved (the impact was lowered), leading to lower  
743 consequences  $C$  overall (Equation 2). However, the welfare of individuals from the three  
744 charismatic large herbivorous species became a point of conflict. Interestingly, it appears that the  
745 conflict was driven by a shift in attitude, from considering the herbivore species as a natural way  
746 to manage the grasslands to being part of the ecosystem changed the value  $V_s$ , or by the  
747 importance given to their emotional capacity  $E_s$  (Ohl and Van der Staay, 2012), therefore leading  
748 to increasing the consequences  $C = V(E_s) \times I(S_s) \times N_s^1$  under sentientism, with  $S_s$  and  $N_s$   
749 constant. Temporal changes in the distributions of the  $V$  and  $E$  variables should therefore be  
750 taken into account when implementing conservation management actions, and even monitored  
751 through time in a way similar to adaptive management approaches. Another possible explanation  
752 for this shift in attitude is that the notion of responsibility (Table 2) affected the moral aspect of  
753 culling that should then be considered in parallel to its consequences. If culling animals can be  
754 considered acceptable in some cases, it may not be the case if these individuals were  
755 purposefully introduced.

756

757 As a result, the reserve management has examined a number of sustainable measures to improve  
758 the welfare of individuals from the three species (therefore decreasing  $S_s$  to compensate the  
759 increase in  $V_s$ ). Among those were recommendations to increase access to natural shelter in  
760 neighbouring areas of woodland or forestry, to create shelter ridges to increase survival in winter  
761 as an ethical and sustainable solution, and to use early culling to regulate populations and avoid  
762 suffering from starvation in winter (ICMO2, 2010). This example shows how a combination of  
763 two complementary management actions (the rewilding of the OVP and the provision of shelter)  
764 led to minimised consequences under both the traditional conservation and the sentientist

765 Equations 2 and 4, whereas only rewilding would increase consequences under Equation 4.  
766 Culling may still face opposition based on moral arguments though.

767

## 768 **Trophy hunting**

769

770 Trophy hunting, the use of charismatic species for hunting activities, has been argued to be good  
771 for conservation when revenues are reinvested properly into nature protection and redistributed  
772 across local communities, but faces criticisms for moral reasons (Di Minin et al., 2016; Lindsey  
773 et al., 2007a). The action of killing some individuals to save others might be incompatible with a  
774 deontological perspective, but, assuming a consequentialist perspective, the framework can be  
775 applied to formalise the assessment of different management options (we are not considering  
776 canned hunting here, the practice of farming animals for the specific purpose of being hunted).

777

778 In traditional conservation, trophy hunting is desirable if it directly contributes to the  
779 maintenance of species diversity. The potential of trophy hunting to contribute to the  
780 maintenance of biodiversity is via creating economic revenues, i.e. an anthropocentric  
781 perspective, and it therefore falls under the umbrella of new conservation. In theory, trophy  
782 hunting should lead to lower consequences than doing nothing for both the traditional and new  
783 conservation (Equations 2 and 3), and therefore for the ‘people and nature’ approach, as they are  
784 in this case not independent from each other (Lindsey et al., 2007b). Many social and biological  
785 factors currently affect the efficacy of trophy hunting as a conservation tool. Corruption and  
786 privatisation of the benefits have sometimes prevented the revenues to be reinvested into  
787 conservation, but also to be redistributed across local communities, whereas doing so has been  
788 shown to increase their participation in conservation actions with proven benefits for local  
789 biodiversity (Di Minin et al., 2016). In other words, a decrease in the anthropocentric Equation 2  
790 leads to a decrease in the ecocentric Equation 3. In addition, trophy hunting can lead to  
791 unexpected evolutionary consequences (Coltman et al., 2003), overharvesting of young males  
792 (Lindsey et al., 2007a), and disproportionate pressure on threatened species (Palazy et al., 2013,  
793 2012, 2011) and therefore to population declines and potential detrimental effects on  
794 biodiversity. Despite these issues, it has been argued that banning trophy hunting may create  
795 replacement activities that would be more detrimental to biodiversity (Di Minin et al., 2016).

796

797 From an animal welfare perspective, trophy hunting appears to be in direct contradiction with a  
798 decrease in animal suffering, and has been criticised by proponents of compassionate  
799 conservation (Wallach et al., 2018). However, as for the culling of invasive alien species, we  
800 suspect the story is more complex. First, there may be direct benefits for animal welfare, if  
801 money from trophy hunting is reinvested in protection measures against poaching (which is  
802 likely more detrimental to the hunted individuals). Second, to our knowledge, only few studies  
803 have compared the welfare of individual animals to quantify the elements of the sentientist  
804 Equation 4 (for example assessed through access to resources) in areas where trophy hunting is  
805 practiced and where it is not. Given the links between biodiversity and animal welfare described  
806 above, it seems plausible that good practice in trophy hunting may benefit the welfare of  
807 individuals from other and from the same species.

808

## 809 **CONCLUSIONS**

810

811 A variety of value systems exist in conservation, which are based on different underlying  
812 normative postulates and can differ between stakeholders, resulting in differing preferences for  
813 conservation practices among people. Here, we have proposed a framework with a formal set of  
814 equations to conceptualize and decompose these different perspectives from a consequentialist  
815 point of view. In this framework, the different value systems supported by different conservation  
816 approaches follow the same structure, but can differ in the variables that are used, and in the  
817 values they are taking. While such a formalisation by necessity does not capture the full range of  
818 complex and nuanced real-world situations in environmental decision-making, it provides a  
819 method to make their underlying value systems and the resulting conflicts explicit and  
820 transparent, which is essential for the planning and implementation of pro-active management.  
821 The search for consensus in conservation can be counter-productive and favour status-quo  
822 against pro-active management (Peterson et al., 2005), however our framework may help  
823 identify hidden commonalities between seemingly antagonistic stances. We hope that this  
824 framework can foster debates on contested conservation issues, and will ultimately contribute to  
825 a broader appreciation of different viewpoints. In an increasingly complex world shaped by  
826 human activities, this is becoming ever more important.

827

828

## 829 **Acknowledgements**

830

831 We thank Franck Courchamp, Vincent Devictor, Jordan Hampton, Jonathan Jeschke, and Thomas  
832 Potthast for extremely useful comments on this manuscript. GL, BL, AS, FE, and SD were  
833 supported by the Austrian Science Foundation FWF (BiodivERsA-Belmont Forum Project 'Alien  
834 Scenarios', grant no. I 4011-B32; grant no. I3757-B29). AP was funded by Conicyt PIA CTE  
835 AFB170008. IJ acknowledges support by the J. E. Purkyně Fellowship of the Czech Academy of  
836 Sciences. JR UW thanks the South African Department of Forestry, Fisheries, and the  
837 Environment (DFFtE) for funding noting that this publication does not necessarily represent the  
838 views or opinions of DFFtE or its employees.

839

## 840 REFERENCES

- 841 Albert, C., Luque, G.M., Courchamp, F., 2018. The twenty most charismatic species. PLoS One  
842 13, e0199149. <https://doi.org/10.1371/journal.pone.0199149>
- 843 Alexander, L., Moore, M., 2016. Deontological Ethics. Stanford Encycl. Philos.
- 844 Allen, C., Trestman, M., 2017. Animal Consciousness. Stanford Encycl. Philos.
- 845 Batavia, C., Nelson, M.P., Bruskotter, J.T., Jones, M.S., Yanco, E., Ramp, D., Bekoff, M.,  
846 Wallach, A.D., 2021. Emotion as a source of moral understanding in conservation. Conserv.  
847 Biol. n/a. <https://doi.org/https://doi.org/10.1111/cobi.13689>
- 848 Beausoleil, N.J., Mellor, D.J., Baker, L., Baker, S.E., Bellio, M., Clarke, A.S., Dale, A., Garlick,  
849 S., Jones, B., Harvey, A., 2018. “Feelings and Fitness” not “Feelings or Fitness” – the raison  
850 d’être of conservation welfare, which aligns conservation and animal welfare objectives.  
851 Front. Vet. Sci. 5, 296.
- 852 Bellard, C., Cassey, P., Blackburn, T.M., 2016. Alien species as a driver of recent extinctions.  
853 Biol. Lett. 12, 20150623. <https://doi.org/10.1098/rsbl.2015.0623>
- 854 Bermond, B., Armstrong, S.J., Botzler, R.G., 2008. A neuropsychological and evolutionary  
855 approach to animal consciousness and animal suffering. Anim. Ethics Read. 2, 99–112.
- 856 Bertolino, S., 2008. Introduction of the American grey squirrel (*Sciurus carolinensis*) in Europe:  
857 a case study in biological invasion. Curr. Sci. 95, 903–906.
- 858 Bhagwat, S.A., Dudley, N., Harrop, S.R., 2011. Religious following in biodiversity hotspots:  
859 challenges and opportunities for conservation and development. Conserv. Lett. 4, 234–240.  
860 <https://doi.org/10.1111/j.1755-263X.2011.00169.x>
- 861 Boissy, A., Lee, C., 2014. How assessing relationships between emotions and cognition can  
862 improve farm animal welfare. Rev. Sci. Tech. 33, 103–110.
- 863 Bolund, P., Hunhammar, S., 1999. Ecosystem services in urban areas. Ecol. Econ. 29, 293–301.  
864 [https://doi.org/10.1016/S0921-8009\(99\)00013-0](https://doi.org/10.1016/S0921-8009(99)00013-0)
- 865 Bottrill, M.C., Joseph, L.N., Carwardine, J., Bode, M., Cook, C., Game, E.T., Grantham, H.,  
866 Kark, S., Linke, S., McDonald-Madden, E., 2008. Is conservation triage just smart decision  
867 making? Trends Ecol. Evol. 23, 649–654. <https://doi.org/10.1016/j.tree.2008.07.007>
- 868 Brennan, A., Lo, Y.-S., 2016. Environmental Ethics. Stanford Encycl. Philos.
- 869 Broom, D.M., 1988. The scientific assessment of animal welfare. Appl. Anim. Behav. Sci. 20, 5–  
870 19. [https://doi.org/10.1016/0168-1591\(88\)90122-0](https://doi.org/10.1016/0168-1591(88)90122-0)
- 871 Büscher, B., 2016. Reassessing fortress conservation? New media and the politics of distinction  
872 in Kruger National Park. Ann. Am. Assoc. Geogr. 106, 114–129.  
873 <https://doi.org/10.1080/00045608.2015.1095061>
- 874 Cardinale, B.J., Duffy, J.E., Gonzalez, A., Hooper, D.U., Perrings, C., Venail, P., Narwani, A.,  
875 Mace, G.M., Tilman, D., Wardle, D.A., Kinzig, A., Daily, G.C., Loreau, M., Grace, J.B.,  
876 Larigauderie, A., Srivastava, D.S., Naeem, S., 2012. Biodiversity loss and its impact on  
877 humanity. Nature 486, 59. <https://doi.org/10.1038/nature11148>
- 878 Carey, M.P., Sanderson, B.L., Barnas, K.A., Olden, J.D., 2012. Native invaders—challenges for  
879 science, management, policy, and society. Front. Ecol. Environ. 10, 373–381.  
880 <https://doi.org/10.1890/110060>
- 881 Chan, K.M.A., Balvanera, P., Benessaiah, K., Chapman, M., Díaz, S., Gómez-Baggethun, E.,  
882 Gould, R., Hannahs, N., Jax, K., Klain, S., Luck, G.W., Martín-López, B., Muraca, B.,  
883 Norton, B., Ott, K., Pascual, U., Satterfield, T., Tadaki, M., Taggart, J., Turner, N., 2016.  
884 Opinion: Why protect nature? Rethinking values and the environment. Proc. Natl. Acad.  
885 Sci. 113, 1462 LP – 1465. <https://doi.org/10.1073/pnas.1525002113>

- 886 Chivian, E., Bernstein, A., 2008. *Sustaining life: how human health depends on biodiversity*.  
887 Oxford University Press.
- 888 Cohen-Shacham, E., Walters, G., Janzen, C., Maginnis, S., 2016. Nature-based solutions to  
889 address global societal challenges. IUCN, Gland, Switz. 97.
- 890 Colléony, A., Clayton, S., Couvet, D., Saint Jalme, M., Prévot, A.-C., 2017. Human preferences  
891 for species conservation: Animal charisma trumps endangered status. *Biol. Conserv.* 206,  
892 263–269. <https://doi.org/10.1016/j.biocon.2016.11.035>
- 893 Coltman, D.W., O’Donoghue, P., Jorgenson, J.T., Hogg, J.T., Strobeck, C., Festa-Bianchet, M.,  
894 2003. Undesirable evolutionary consequences of trophy hunting. *Nature* 426, 655.  
895 <https://doi.org/10.1038/nature02177>
- 896 Costanza, R., D’Arge, R., De Groot, R., Farber, S., Grasso, M., Hannon, B., Limburg, K.,  
897 Naeem, S., O’neill, R. V, Paruelo, J., Raskin, R.G., Sutton, P., van den Belt, M., 1997. The  
898 value of the world’s ecosystem services and natural capital. *Nature* 387, 253–260.  
899 [https://doi.org/10.1016/S0921-8009\(98\)00020-2](https://doi.org/10.1016/S0921-8009(98)00020-2)
- 900 Courchamp, F., Fournier, A., Bellard, C., Bertelsmeier, C., Bonnaud, E., Jeschke, J.M., Russell,  
901 J.C., 2017. Invasion biology: specific problems and possible solutions. *Trends Ecol. Evol.*  
902 32, 13–22. <https://doi.org/10.1016/j.tree.2016.11.001>
- 903 Courchamp, F., Jaric, I., Albert, C., Meinard, Y., Ripple, W.J., Chapron, G., 2018. The  
904 paradoxical extinction of the most charismatic animals. *PLoS Biol.* 16, e2003997.  
905 <https://doi.org/10.1371/journal.pbio.2003997>
- 906 Crowley, S.L., Hinchliffe, S., McDonald, R.A., 2017. Conflict in invasive species management.  
907 *Front. Ecol. Environ.* 15, 133–141. <https://doi.org/10.1002/fee.1471>
- 908 Dawkins, M.S., 2008. The science of animal suffering. *Ethology* 114, 937–945.
- 909 de Waal, F.B.M., 2011. What is an animal emotion? *Ann. N. Y. Acad. Sci.* 1224, 191–206.  
910 <https://doi.org/10.1111/j.1749-6632.2010.05912.x>
- 911 Désiré, L., Boissy, A., Veissier, I., 2002. Emotions in farm animals:: a new approach to animal  
912 welfare in applied ethology. *Behav. Processes* 60, 165–180. [https://doi.org/10.1016/S0376-6357\(02\)00081-5](https://doi.org/10.1016/S0376-6357(02)00081-5)
- 914 Di Minin, E., Leader-Williams, N., Bradshaw, C.J.A., 2016. Banning trophy hunting will  
915 exacerbate biodiversity loss. *Trends Ecol. Evol.* 31, 99–102.  
916 <https://doi.org/10.1016/j.tree.2015.12.006>
- 917 Díaz, S., Pascual, U., Stenseke, M., Martín-López, B., Watson, R.T., Molnár, Z., Hill, R., Chan,  
918 K.M.A., Baste, I.A., Brauman, K.A., 2018. Assessing nature’s contributions to people.  
919 *Science* (80-. ). 359, 270–272. <https://doi.org/10.1126/science.aap8826>
- 920 Doak, D.F., Bakker, V.J., Goldstein, B.E., Hale, B., 2015. What is the future of conservation?, in:  
921 *Protecting the Wild*. Springer, pp. 27–35. [https://doi.org/10.5822/978-1-61091-551-9\\_4](https://doi.org/10.5822/978-1-61091-551-9_4)
- 922 Driscoll, D.A., Watson, M.J., 2019. Science denialism and compassionate conservation: response  
923 to Wallach et al. 2018. *Conserv. Biol.* 33, 777–780. <https://doi.org/10.1111/cobi.13273>
- 924 Dubois, S., Fenwick, N., Ryan, E.A., Baker, L., Baker, S.E., Beausoleil, N.J., Carter, S.,  
925 Cartwright, B., Costa, F., Draper, C., 2017. International consensus principles for ethical  
926 wildlife control. *Conserv. Biol.* 31, 753–760. <https://doi.org/10.1111/cobi.12896>
- 927 Essl, F., Erb, K., Glatzel, S., Pauchard, A., 2018. Climate change, carbon market instruments, and  
928 biodiversity: focusing on synergies and avoiding pitfalls. *Wiley Interdiscip. Rev. Clim.*  
929 *Chang.* 9, e486. <https://doi.org/10.1002/wcc.486>
- 930 Essl, F., Hulme, P.E., Jeschke, J.M., Keller, R., Pyšek, P., Richardson, D.M., Saul, W.-C., Bacher,  
931 S., Dullinger, S., Estévez, R.A., Kueffer, C., Roy, H.E., Seebens, H., Rabitsch, W., 2017.

- 932 Scientific and normative foundations for the valuation of alien-species impacts: thirteen  
933 core principles. *Bioscience* 67, 166–178. <https://doi.org/10.1093/biosci/biw160>
- 934 Farah, M.J., 2008. Neuroethics and the problem of other minds: Implications of neuroscience for  
935 the moral status of brain-damaged patients and nonhuman animals. *Neuroethics* 1, 9–18.
- 936 Fisher, B., Turner, K., Zylstra, M., Brouwer, R., De Groot, R., Farber, S., Ferraro, P., Green, R.,  
937 Hadley, D., Harlow, J., 2008. Ecosystem services and economic theory: integration for  
938 policy-relevant research. *Ecol. Appl.* 18, 2050–2067. <https://doi.org/10.1890/07-1537.1>
- 939 Gamborg, C., Gremmen, B., Christiansen, S.B., Sandoe, P., 2010. De-domestication: ethics at the  
940 intersection of landscape restoration and animal welfare. *Environ. Values* 19, 57–78.
- 941 Garibaldi, A., Turner, N., 2004. Cultural keystone species: implications for ecological  
942 conservation and restoration. *Ecol. Soc.* 9.
- 943 Gaston, K.J., 2010. Valuing common species. *Science* (80-. ). 327, 154–155.  
944 <https://doi.org/10.1126/science.1182818>
- 945 Genovesi, P., Bertolino, S., 2001. Human dimension aspects in invasive alien species issues: the  
946 case of the failure of the grey squirrel eradication project in Italy. *Gt. reshuffling Hum.*  
947 *Dimens. invasive alien species.* IUCN, Gland 113–119.
- 948 Gibbs, E.P.J., 2014. The evolution of One Health: a decade of progress and challenges for the  
949 future. *Vet. Rec.* 174, 85–91.
- 950 Gibbs, L., Warren, A., 2015. Transforming shark hazard policy: Learning from ocean-users and  
951 shark encounter in Western Australia. *Mar. Policy* 58, 116–124.  
952 <https://doi.org/10.1016/j.marpol.2015.04.014>
- 953 Goetghebeur, M., Wagner, M., 2017. Identifying Value(s): A Reflection on the Ethical Aspects of  
954 MCDA in Healthcare Decisionmaking BT - Multi-Criteria Decision Analysis to Support  
955 Healthcare Decisions, in: Marsh, K., Goetghebeur, M., Thokala, P., Baltussen, R. (Eds.), .  
956 Springer International Publishing, Cham, pp. 29–46. [https://doi.org/10.1007/978-3-319-47540-0\\_3](https://doi.org/10.1007/978-3-319-47540-0_3)
- 957
- 958 Griffin, A.S., Callen, A., Klop-Toker, K., Scanlon, R.J., Hayward, M.W., 2020. Compassionate  
959 conservation clashes with conservation biology: should empathy, compassion, and  
960 deontological moral principles drive conservation practice? *Front. Psychol.* 11, 1139.
- 961 Hampton, J.O., Hyndman, T.H., 2018. Underaddressed animal-welfare issues in conservation.  
962 *Conserv. Biol.*
- 963 Hampton, J.O., Warburton, B., Sandøe, P., 2018. Compassionate versus consequentialist  
964 conservation. *Conserv. Biol.*
- 965 Hayward, M.W., Callen, A., Allen, B.L., Ballard, G., Broekhuis, F., Bugir, C., Clarke, R.H.,  
966 Clulow, J., Clulow, S., Daltry, J.C., Davies-Mostert, H.T., Fleming, P.J.S., Griffin, A.S.,  
967 Howell, L.G., Kerley, G.I.H., Klop-Toker, K., Legge, S., Major, T., Meyer, N., Montgomery,  
968 R.A., Moseby, K., Parker, D.M., Périquet, S., Read, J., Scanlon, R., Seeto, R., Shuttleworth,  
969 C., Somers, M.J., Tamessar, C.T., Tuft, K., Upton, R., Valenzuela-Molina, M., Wayne, A.,  
970 Witt, R.R., Wüster, W., 2019. Deconstructing compassionate conservation. *Conserv. Biol.*  
971 33, 760–768. <https://doi.org/10.1111/cobi.13366>
- 972 Huang, I.B., Keisler, J., Linkov, I., 2011. Multi-criteria decision analysis in environmental  
973 sciences: ten years of applications and trends. *Sci. Total Environ.* 409, 3578–3594.  
974 <https://doi.org/10.1016/j.scitotenv.2011.06.022>
- 975 Hursthouse, R., Pettigrove, G., 2018. Virtue Ethics. *Stanford Encycl. Philos.*
- 976 ICMO2, 2010. Natural processes, animal welfare, moral aspects and management of the  
977 Oostvaardersplassen, Report of the second International Commission on Management of the

- 978 Oostvaardersplassen (ICMO2). The Hague/Wageningen, Netherlands. Wing rapport 039.  
979 November 2010.
- 980 IUCN-CEM, 2016. The IUCN Red List of Ecosystems. Version 2016-1. <<http://iucnrle.org>>.  
981 IUCN, 2019. The IUCN Red List of Threatened Species. Version 2019-1.  
982 <<http://www.iucnredlist.org>>.
- 983 Jarić, I., Courchamp, F., Correia, R.A., Crowley, S.L., Essl, F., Fischer, A., González-Moreno, P.,  
984 Kalinkat, G., Lambin, X., Lenzner, B., 2020. The role of species charisma in biological  
985 invasions. *Front. Ecol. Environ.* <https://doi.org/10.1002/fee.2195>
- 986 Kareiva, P., 2014. New conservation: setting the record straight and finding common ground.  
987 *Conserv. Biol.* 28, 634–636. <https://doi.org/10.1111/cobi.12295>
- 988 Kareiva, P., Marvier, M., 2012. What is conservation science? *Bioscience* 62, 962–969.  
989 <https://doi.org/10.1525/bio.2012.62.11.5>
- 990 Katz, E., Light, A., 2013. *Environmental Pragmatism, Environmental Philosophies*. Taylor &  
991 Francis.
- 992 Kunsch, P.L., Kavathatzopoulos, I., Rauschmayer, F., 2009. Modelling complex ethical decision  
993 problems with operations research. *Omega* 37, 1100–1108.  
994 <https://doi.org/10.1016/j.omega.2008.11.006>
- 995 Kuussaari, M., Bommarco, R., Heikkinen, R.K., Helm, A., Krauss, J., Lindborg, R., Öckinger,  
996 E., Pärtel, M., Pino, J., Rodà, F., 2009. Extinction debt: a challenge for biodiversity  
997 conservation. *Trends Ecol. Evol.* 24, 564–571. <https://doi.org/10.1016/j.tree.2009.04.011>
- 998 Lindsey, P.A., Frank, L.G., Alexander, R., Mathieson, A., Romanach, S.S., 2007a. Trophy  
999 hunting and conservation in Africa: problems and one potential solution. *Conserv. Biol.* 21,  
1000 880–883. <https://doi.org/10.1111/j.1523-1739.2006.00594.x>
- 1001 Lindsey, P.A., Roulet, P.A., Romanach, S.S., 2007b. Economic and conservation significance of  
1002 the trophy hunting industry in sub-Saharan Africa. *Biol. Conserv.* 134, 455–469.  
1003 <https://doi.org/10.1016/j.biocon.2006.09.005>
- 1004 Littmann, G., 2016. “The Needs of the Many Outweigh the Needs of the Few”: Utilitarianism  
1005 and Star Trek. *Ultim. Star Trek Philos.*, Wiley Online Books.  
1006 <https://doi.org/https://doi.org/10.1002/9781119146032.ch12>
- 1007 Mace, G.M., 2014. Whose conservation? *Science* (80-. ). 345, 1558–1560.  
1008 <https://doi.org/10.1126/science.1254704>
- 1009 Mace, G.M., Lande, R., 1991. Assessing Extinction Threats: Toward a Reevaluation of IUCN  
1010 Threatened Species Categories. *Conserv. Biol.* 5, 148–157.  
1011 <https://doi.org/https://doi.org/10.1111/j.1523-1739.1991.tb00119.x>
- 1012 MacLean, E.L., Matthews, L.J., Hare, B.A., Nunn, C.L., Anderson, R.C., Aureli, F., Brannon,  
1013 E.M., Call, J., Drea, C.M., Emery, N.J., 2012. How does cognition evolve? Phylogenetic  
1014 comparative psychology. *Anim. Cogn.* 15, 223–238. <https://doi.org/10.1007/s10071-011-0448-8>
- 1015
- 1016 Miller, T.R., Minter, B.A., Malan, L.-C., 2011. The new conservation debate: the view from  
1017 practical ethics. *Biol. Conserv.* 144, 948–957. <https://doi.org/10.1016/j.biocon.2010.04.001>
- 1018 Mills, L.S., Soulé, M.E., Doak, D.F., 1993. The keystone-species concept in ecology and  
1019 conservation. *Bioscience* 43, 219–224. <https://doi.org/10.2307/1312122>
- 1020 Norton, B.G., 2000. Biodiversity and environmental values: in search of a universal earth ethic.  
1021 *Biodivers. Conserv.* 9, 1029–1044. <https://doi.org/10.1023/A:1008966400817>
- 1022 Norton, B.G., 1986. Conservation and preservation: A conceptual rehabilitation. *Environ. Ethics*  
1023 8, 195–220.



- 1024 Norton, B.G., 1984. Environmental ethics and weak anthropocentrism. *Environ. Ethics* 6, 131–  
1025 148.
- 1026 Ohl, F., Van der Staay, F.J., 2012. Animal welfare: At the interface between science and society.  
1027 *Vet. J.* 192, 13–19. <https://doi.org/10.1016/j.tvjl.2011.05.019>
- 1028 Oommen, M.A., Cooney, R., Ramesh, M., Archer, M., Brockington, D., Buscher, B., Fletcher,  
1029 R., Natusch, D.J.D., Vanak, A.T., Webb, G., 2019. The fatal flaws of compassionate  
1030 conservation. *Conserv. Biol.* 33, 784–787. <https://doi.org/10.1111/cobi.13329>
- 1031 Oxford English Dictionary, n.d. anthropomorphism, n [WWW Document]. URL  
1032 <https://www.oed.com/view/Entry/8449?redirectedFrom=empathy> (accessed 11.4.19a).
- 1033 Oxford English Dictionary, n.d. consequentialism, n. [WWW Document]. URL  
1034 [http://www.oed.com.ezproxy.lib.monash.edu.au/view/Entry/39548?redirectedFrom=conseq](http://www.oed.com.ezproxy.lib.monash.edu.au/view/Entry/39548?redirectedFrom=consequentialist#eid8585927)  
1035 [uentialist#eid8585927](http://www.oed.com.ezproxy.lib.monash.edu.au/view/Entry/39548?redirectedFrom=consequentialist#eid8585927)
- 1036 Oxford English Dictionary, n.d. empathy, n. [WWW Document]. URL  
1037 <https://www.oed.com/view/Entry/61284?redirectedFrom=empathy> (accessed 11.4.19c).
- 1038 Oxford English Dictionary, n.d. neoteny, n [WWW Document]. URL [https://www.oed-](https://www.oed-com.uaccess.univie.ac.at/view/Entry/126078?redirectedFrom=neoteny#eid)  
1039 [com.uaccess.univie.ac.at/view/Entry/126078?redirectedFrom=neoteny#eid](https://www.oed-com.uaccess.univie.ac.at/view/Entry/126078?redirectedFrom=neoteny#eid)
- 1040 Palazy, L., Bonenfant, C., Gaillard, J.-M., Courchamp, F., 2013. On the use of the IUCN status  
1041 for the management of trophy hunting. *Wildl. Res.* 39, 711–720.  
1042 <https://doi.org/10.1071/WR12121>
- 1043 Palazy, L., Bonenfant, C., Gaillard, J.-M., Courchamp, F., 2011. Cat dilemma: too protected to  
1044 escape trophy hunting? *PLoS One* 6, e22424. <https://doi.org/10.1371/journal.pone.0022424>
- 1045 Palazy, L., Bonenfant, C., Gaillard, J.M., Courchamp, F., 2012. Rarity, trophy hunting and  
1046 ungulates. *Anim. Conserv.* 15, 4–11. <https://doi.org/10.1111/j.1469-1795.2011.00476.x>
- 1047 Palmer, C., McShane, K., Sandler, R., 2014. Environmental ethics. *Annu. Rev. Environ. Resour.*  
1048 39, 419–442. <https://doi.org/10.1146/annurev-environ-121112-094434>
- 1049 Parker, I.M., Simberloff, D., Lonsdale, W.M., Goodell, K., Wonham, M., Kareiva, P.M.,  
1050 Williamson, M.H., Von Holle, B., Moyle, P.B., Byers, J.E., Goldwasser, L., 1999. Impact:  
1051 toward a framework for understanding the ecological effects of invaders. *Biol. Invasions* 1,  
1052 3–19. <https://doi.org/10.1023/A:1010034312781>
- 1053 Peterson, M.N., Peterson, M.J., Peterson, T.R., 2005. Conservation and the myth of consensus.  
1054 *Conserv. Biol.* 19, 762–767. <https://doi.org/10.1111/j.1523-1739.2005.00518.x>
- 1055 Proença, V.M., Pereira, H.M., Vicente, L., 2008. Organismal complexity is an indicator of  
1056 species existence value. *Front. Ecol. Environ.* 6, 298–299. [https://doi.org/10.1890/1540-](https://doi.org/10.1890/1540-9295(2008)6[298:OCIAIO]2.0.CO;2)  
1057 [9295\(2008\)6\[298:OCIAIO\]2.0.CO;2](https://doi.org/10.1890/1540-9295(2008)6[298:OCIAIO]2.0.CO;2)
- 1058 Proulx, G., Brook, R.K., Cattet, M., Darimont, C., Paquet, P.C., 2016. Poisoning wolves with  
1059 strychnine is unacceptable in experimental studies and conservation programmes. *Environ.*  
1060 *Conserv.* 43, 1–2. <https://doi.org/10.1017/S0376892915000211>
- 1061 Ramp, D., Bekoff, M., 2015. Compassion as a practical and evolved ethic for conservation.  
1062 *Bioscience* 65, 323–327. <https://doi.org/10.1093/biosci/biu223>
- 1063 Redpath, S.M., Young, J., Evely, A., Adams, W.M., Sutherland, W.J., Whitehouse, A., Amar, A.,  
1064 Lambert, R.A., Linnell, J.D.C., Watt, A., 2013. Understanding and managing conservation  
1065 conflicts. *Trends Ecol. Evol.* 28, 100–109. <https://doi.org/10.1016/j.tree.2012.08.021>
- 1066 Regan, T., 2004. The case for animal rights. Univ of California Press.
- 1067 Rikoon, J.S., 2006. Wild horses and the political ecology of nature restoration in the Missouri  
1068 Ozarks. *Geoforum* 37, 200–211. <https://doi.org/10.1016/j.geoforum.2005.01.010>
- 1069 Rohwer, Y., Marris, E., 2021. Ecosystem integrity is neither real nor valuable. *Conserv. Sci.*

- 1070 Pract. n/a, e411. <https://doi.org/https://doi.org/10.1111/csp2.411>
- 1071 Rolston III, H., 2003. Environmental ethics, in: Bunnin, N., Tsui-James, E.P. (Eds.), *The*
- 1072 *Blackwell Companion to Philosophy*, 2nd Edition. Blackwell Publishing, Oxford.
- 1073 Russell, J.C., Jones, H.P., Armstrong, D.P., Courchamp, F., Kappes, P.J., Seddon, P.J., Opper, S.,
- 1074 Rauzon, M.J., Cowan, P.E., Rocamora, G., 2016. Importance of lethal control of invasive
- 1075 predators for island conservation. *Conserv. Biol.* 30, 670–672.
- 1076 <https://doi.org/10.1111/cobi.12666>
- 1077 Salt, H.S., 1894. *Animals' Rights: Considered in Relation to Social Progress*. New York, London,
- 1078 Macmillan & Co.
- 1079 Sandler, R., 2012. Intrinsic Value, Ecology, and Conservation. *Nat. Educ. Knowl.* 3, 4.
- 1080 Schuchert, P., Shuttleworth, C.M., McInnes, C.J., Everest, D.J., Rushton, S.P., 2014. Landscape
- 1081 scale impacts of culling upon a European grey squirrel population: can trapping reduce
- 1082 population size and decrease the threat of squirrelpox virus infection for the native red
- 1083 squirrel? *Biol. Invasions* 16, 2381–2391. <https://doi.org/10.1007/s10530-014-0671-8>
- 1084 Shao, Y., Li, M., Zhang, W., Ji, Y., Hayes, D.J., 2018. World's Largest Pork Producer in Crisis:
- 1085 China's African Swine Fever Outbreak. *Agric. Policy Rev.* 2018, 1.
- 1086 Shriver, A., 2006. Minding mammals. *Philos. Psychol.* 19, 433–442.
- 1087 <https://doi.org/10.1080/09515080600726385>
- 1088 Singer, P., 2009. Speciesism and moral status. *Metaphilosophy* 40, 567–581.
- 1089 <https://doi.org/10.1111/j.1467-9973.2009.01608.x>
- 1090 Singer, P., 1980. Utilitarianism and vegetarianism. *Philos. Public Aff.* 325–337.
- 1091 Siurua, H., 2006. Nature above people: Rolston and “fortress” conservation in the south. *Ethics*
- 1092 *Environ.* 71–96.
- 1093 Soulé, M.E., 2014. The “New Conservation.” *Conserv. Biol.* 27, 895–897.
- 1094 <https://doi.org/10.1111/cobi.12147>
- 1095 Soulé, M.E., 1985. What is conservation biology? *Bioscience* 35, 727–734.
- 1096 <https://doi.org/10.2307/1310054>
- 1097 Stokes, D.L., 2007. Things we like: human preferences among similar organisms and
- 1098 implications for conservation. *Hum. Ecol.* 35, 361–369. [https://doi.org/10.1007/s10745-](https://doi.org/10.1007/s10745-006-9056-7)
- 1099 [006-9056-7](https://doi.org/10.1007/s10745-006-9056-7)
- 1100 Talbert, M., 2019. Moral Responsibility. *Stanford Encycl. Philos.*
- 1101 Tam, K.-P., Lee, S.-L., Chao, M.M., 2013. Saving Mr. Nature: Anthropomorphism enhances
- 1102 connectedness to and protectiveness toward nature. *J. Exp. Soc. Psychol.* 49, 514–521.
- 1103 <https://doi.org/10.1016/j.jesp.2013.02.001>
- 1104 Taylor, P.W., 2011. *Respect for nature: A theory of environmental ethics*. Princeton University
- 1105 Press.
- 1106 Taylor, P.W., 1987. Inherent value and moral rights. *Monist* 70, 15–30.
- 1107 Twigg, L.E., Parker, R.W., 2010. Is sodium fluoroacetate (1080) a humane poison? The influence
- 1108 of mode of action, physiological effects, and target specificity. *Anim. Welf.* 19, 249–263.
- 1109 UNEP CBD, 2010. Strategic plan for biodiversity 2011–2020 and the Aichi targets, in: Report of
- 1110 the Tenth Meeting of the Conference of the Parties to the Convention on Biological
- 1111 Diversity.
- 1112 Varner, G., 2011. Environmental ethics, hunting, and the place of animals, in: *The Oxford*
- 1113 *Handbook of Animal Ethics*. <https://doi.org/10.1093/oxfordhb/9780195371963.013.0032>
- 1114 Varner, G., 2008. Utilitarianism and the evolution of ecological ethics. *Sci. Eng. Ethics* 14, 551–
- 1115 573. <https://doi.org/10.1007/s11948-008-9102-5>

- 1116 Wallach, A.D., Batavia, C., Bekoff, M., Alexander, S., Baker, L., Ben-Ami, D., Boronyak, L.,  
1117 Cardilin, A.P.A., Carmel, Y., Celermajer, D., Coghlan, S., Dahdal, Y., Gomez, J.J., Kaplan,  
1118 G., Keynan, O., Khalilieh, A., Kopnina, H., Lynn, W.S., Narayanan, S.R., Santiago-Ávila,  
1119 F.J., Yanco, E., Zemanova, M.A., Ramp, D., 2020. Recognizing animal personhood in  
1120 compassionate conservation. *Conserv. Biol.* <https://doi.org/10.1111/cobi.13494>  
1121 Wallach, A.D., Bekoff, M., Batavia, C., Nelson, M.P., Ramp, D., 2018. Summoning compassion  
1122 to address the challenges of conservation. *Conserv. Biol.* 32, 1255–1265.  
1123 <https://doi.org/10.1111/cobi.13126>  
1124 Warren, M.A., 2000. *Moral Status: Obligations to Persons and Other Living Things, Issues in*  
1125 *Biomedical Ethics*. Oxford University Press, Oxford.  
1126 <https://doi.org/10.1093/acprof:oso/9780198250401.001.0001>  
1127 Waytz, A., Iyer, R., Young, L., Haidt, J., Graham, J., 2019. Ideological differences in the expanse  
1128 of the moral circle. *Nat. Commun.* 10, 1–12. <https://doi.org/10.1038/s41467-019-12227-0>  
1129 Weitz, N., Carlsen, H., Nilsson, M., Skånberg, K., 2018. Towards systemic and contextual  
1130 priority setting for implementing the 2030 Agenda. *Sustain. Sci.* 13, 531–548.  
1131 <https://doi.org/10.1007/s11625-017-0470-0>  
1132 Wilson, G.R., Edwards, M., 2019. Professional kangaroo population control leads to better  
1133 animal welfare, conservation outcomes and avoids waste. *Aust. Zool.* 40, 181–202.  
1134 Wittmer, H., Rauschmayer, F., Klauer, B., 2006. How to select instruments for the resolution of  
1135 environmental conflicts? *Land use policy* 23, 1–9.  
1136

1137 **Tables**

1138

1139 **Table1.** Glossary of terms as they are used for the purposes of this paper.

| <b>Term</b>                   | <b>Definition</b>                                                                                                                                                                                                                                                                                                                                                                                                                                                   |
|-------------------------------|---------------------------------------------------------------------------------------------------------------------------------------------------------------------------------------------------------------------------------------------------------------------------------------------------------------------------------------------------------------------------------------------------------------------------------------------------------------------|
| Anthropocentrism<br>(strong)  | Value system that considers humans to be the sole, or primary, holder of moral standing, and therefore the concern of direct moral obligations. Non-human species are considered only to the extent that they affect the satisfaction of felt preference of human individuals (Norton, 1984; Palmer et al., 2014; Rolston III, 2003).                                                                                                                               |
| Anthropocentrism<br>(weak)    | Value theory in which all values are "explained by reference to satisfaction of some felt preference of a human individual or by reference to its bearing upon the ideals which exist as elements in a world view essential to determinations of considered preferences" (Norton, 1984). That is, the value of an individual or species is not only exploitative, but incorporates human experience and the non-utilitarian relationship between humans and nature. |
| Anthropomorphism              | “The attribution of human personality or characteristics to something non-human, like an animal, object, etc.” (Oxford English Dictionary).                                                                                                                                                                                                                                                                                                                         |
| Biocentrism                   | Value system considering all living beings as the concern of direct moral obligations (Palmer et al., 2014; Rolston III, 2003).                                                                                                                                                                                                                                                                                                                                     |
| Collectivism                  | Value system in which a group or collective has a higher value than the individuals that compose it (Wallach et al., 2018).                                                                                                                                                                                                                                                                                                                                         |
| Compassionate<br>conservation | Conservation approach inspired by virtue ethics based on four tenets: i) do no harm; ii) individuals matter; iii) inclusivity (the value of an individual is independent from the context of the population, e.g. nativity, rarity, etc.); and iv) peaceful coexistence (Ramp and Bekoff, 2015; Wallach et al., 2018).                                                                                                                                              |
| Community of<br>moral agents  | The group of beings considered to have moral responsibility in their actions (Talbert, 2019). We consider it here to be restricted to humans.                                                                                                                                                                                                                                                                                                                       |

|                                                  |                                                                                                                                                                                                                                                                                                                                                    |
|--------------------------------------------------|----------------------------------------------------------------------------------------------------------------------------------------------------------------------------------------------------------------------------------------------------------------------------------------------------------------------------------------------------|
| Community of moral patients                      | The group of beings considered to have intrinsic moral value, and towards which moral agents have moral obligations (Warren, 2000). The size of the group (referred to as the moral community in this work, for simplification) depends on the value system. For example, the moral community is restricted to humans in case of Anthropocentrism. |
| Conservation welfare                             | Conservation approach aiming at minimizing animal suffering (Beausoleil et al., 2018).                                                                                                                                                                                                                                                             |
| Consequentialism                                 | “An ethical doctrine which holds that the morality of an action is to be judged solely by its consequences” (Oxford English Dictionary).                                                                                                                                                                                                           |
| Convergence hypothesis                           | “If the interests of the human species interpenetrate those of the living Earth, then it follows that anthropocentric and nonanthropocentric policies will converge in the indefinite future” (Norton, 1986).                                                                                                                                      |
| Deontology                                       | A normative ethical theory considering that “choices are morally required, forbidden, or permitted” (Alexander and Moore, 2016).                                                                                                                                                                                                                   |
| Ecocentrism                                      | Value system considering that species, their assemblages and their functions, as well as more broadly ecosystems, rather than individuals, are the concern of direct moral obligations (Palmer et al., 2014; Rolston III, 2003).                                                                                                                   |
| Empathy                                          | “The quality or power of projecting one's personality into or mentally identifying oneself with an object of contemplation, and so fully understanding or appreciating it.” (Oxford English Dictionary). Empathy will influence the inherent value given to individuals from other species.                                                        |
| Impact (for the purposes of the framework, Eq.1) | Impact refers to any effect that modifies the wellbeing, health or resilience (for non-sentient beings) of an individual, from physical pain to emotional suffering and death (these notions being interrelated, but not equivalent).                                                                                                              |
| Inherent value (our definition)                  | Value possessed by an individual or collective, accounting for the effects of multiple context-dependent factors (e.g. charisma, anthropomorphism, organismic complexity, neoteny, cultural importance, religion, or parochialism).                                                                                                                |

|                        |                                                                                                                                                                                                                                                                                                                                                                               |
|------------------------|-------------------------------------------------------------------------------------------------------------------------------------------------------------------------------------------------------------------------------------------------------------------------------------------------------------------------------------------------------------------------------|
| Intrinsic value        | Value possessed by an individual or collective as defined by a system of moral valuation, such as anthropocentrism, sentientism, biocentrism or ecocentrism. Intrinsic value is context-independent, and based on objective criteria (but the choice of criteria is subjective).                                                                                              |
| Invasive alien species | “Plants, animals, pathogens and other organisms that are non-native to an ecosystem, and which may cause economic or environmental harm or adversely affect human health” ( <i>Regulation (EU) No 1143/2014 of the European Parliament and of the Council of 22 October 2014 on the prevention and management of the introduction and spread of invasive alien species</i> ). |
| Moral community        | See “Community of moral patients”.                                                                                                                                                                                                                                                                                                                                            |
| Nativism               | Value system considering that species that have evolved in a given location have a higher value in this location than species that have evolved somewhere else. In nativism, value varies spatially (Wallach et al., 2018).                                                                                                                                                   |
| Nature despite people  | Management conceptual approach aiming at conserving biological diversity (focusing on species and habitats) specifically in response to human impacts on the environment, e.g. sustainable use (Mace, 2014).                                                                                                                                                                  |
| Nature for itself      | Management conceptual approach aiming at conserving biological diversity (focusing on wilderness and natural habitats) through human exclusion, for example through the creation of parks and protected areas (Mace, 2014).                                                                                                                                                   |
| Nature for people      | Management conceptual approach aiming at conserving the components of nature beneficial to humans (focusing on ecosystems and their services) (Mace, 2014).                                                                                                                                                                                                                   |
| Neoteny                | “The retention of juvenile characteristics in a (sexually) mature organism” (Oxford English Dictionary).                                                                                                                                                                                                                                                                      |
| New conservation       | Discipline aiming at preserving biological diversity through the conservation of natural elements providing services and contribution to human wellbeing (Kareiva, 2014; Kareiva and Marvier, 2012).                                                                                                                                                                          |

|                          |                                                                                                                                                                                                                                                                                                                                                  |
|--------------------------|--------------------------------------------------------------------------------------------------------------------------------------------------------------------------------------------------------------------------------------------------------------------------------------------------------------------------------------------------|
| Normative postulate      | Value statements that make up the basis of an ethic of appropriate attitudes toward other forms of life (Soulé, 1985).                                                                                                                                                                                                                           |
| Parochialism             | Ideology in which moral regard is directed “towards socially closer and structurally tighter targets, relative to socially more distant and structurally looser targets”, and, by extension, to species phylogenetically, cognitively, or in appearance closer to humans (Waytz et al., 2019).                                                   |
| People and nature        | Management conceptual approach considering that humans and nature are interdependent and therefore aiming at achieving compromises in the conservation of nature and human wellbeing (Mace, 2014).                                                                                                                                               |
| Sentience                | The ability to experience phenomenal consciousness, i.e. the qualitative, subjective, experiential, or phenomenological aspects of conscious experience, rather than just the experience of pain and pleasure (Allen and Trestman, 2017).                                                                                                        |
| Sentientism              | Value system considering sentient beings as the concern of direct moral obligations (Palmer et al., 2014; Rolston III, 2003).                                                                                                                                                                                                                    |
| Speciesism               | Value system in which some species are considered to have a higher value than others, for various possible reasons (Singer, 2009).<br>Speciesism is often used to refer to the superiority of humans, which is a specific expression of speciesism as considered in this paper.                                                                  |
| Suffering                | Negative emotion, sometimes called emotional distress, experienced by sentient beings, and which can result from different causes, including but not limited to physical pain (Dawkins, 2008; Farah, 2008).                                                                                                                                      |
| Traditional conservation | Discipline aiming at preserving biological diversity through the management of nature, and based on four value-driven normative postulates: “diversity of organisms is good,” “ecological complexity is good,” “evolution is good,” and “biotic diversity has intrinsic value” (Soulé, 1985). Traditional conservation is rooted in ecocentrism. |
| Utilitarian value        | Value given to an individual or collective by humans, based on its utility.                                                                                                                                                                                                                                                                      |
| Virtue ethics            | Ethical doctrine that emphasizes the virtues, or moral character as the reason for action (Hursthouse and Pettigrove, 2018).                                                                                                                                                                                                                     |

---

1140 **Table 2.** List of factors to consider regarding the effects of environmental management actions  
 1141 from an environmental ethics perspective.

| <b>Factor</b>                              | <b>Influence on variables and outputs in Equations 1 to 5</b>                                                                                                                                                                                                                                                                                                                                  |
|--------------------------------------------|------------------------------------------------------------------------------------------------------------------------------------------------------------------------------------------------------------------------------------------------------------------------------------------------------------------------------------------------------------------------------------------------|
| Biotic interactions                        | The impact or suffering of individuals from one species can be caused by individuals from another species, either through direct or indirect interactions. Management actions can therefore also have non-trivial indirect impacts on some species.                                                                                                                                            |
| Capacity to provide ecosystem services     | The presence of a specific species may increase the fitness/welfare of other species through the ecosystem services it provides. Since these effects can be difficult to quantify explicitly, the value of such species may be increased in Equations 1 to 4 to account for them.                                                                                                              |
| Discounting rate                           | Rate at which impacts that occur in the future lose importance.                                                                                                                                                                                                                                                                                                                                |
| Impact quantification and commensurability | How the impacts of management actions are quantified is also dependent on value systems, as some impacts (such as death) may be considered incommensurable to others (such as suffering).                                                                                                                                                                                                      |
| Responsibility from previous actions       | Previous human actions on certain species, such as reintroduction of domesticated species or the introduction of alien species can change the perception of the public and therefore change the inherent value attributed to these species, or change the morality of an action, in addition to obviously having an impact on these species.                                                   |
| Spatial scale                              | The spatial scale will change the abundance $N$ and the number of species considered. As a result, a management action that is more beneficial than another at small scale may not be such at a larger scale, and reciprocally. Additionally, the spatial scale can change the inherent value of species, for example under nativism, or because of the range of cultures that are considered. |
| Temporal scale                             | The time frame over which the impact or the suffering of individuals is computed can change their values. Management actions may decrease welfare of individuals on the short term, but                                                                                                                                                                                                        |



---

|                                                  |                                                                                                                                                                                                                                                                                                               |
|--------------------------------------------------|---------------------------------------------------------------------------------------------------------------------------------------------------------------------------------------------------------------------------------------------------------------------------------------------------------------|
|                                                  | be beneficial on the long term once the ecosystem has stabilised. Similarly, not culling some population may cause less suffering on the short term, but increase it in the future by disrupting ecosystem services, leading to population collapse due to lack of resources, etc.                            |
| Uncertainty of impact                            | The complexity of an ecological system can make the impact of management actions on different species difficult to assess precisely, therefore creating potential errors, especially in the presence of multiple biotic interactions. This may lead to an incorrect estimation of the consequences <i>C</i> . |
| Uncertainty of value expressions and preferences | Quantifying the value given by a person or a group of people to an individual is difficult, context-dependent, and highly subjective. Sensitivity analyses on the distribution of values can be used to account for such uncertainty.                                                                         |

---

1142

1143

1144

1145 **Figure**

1146

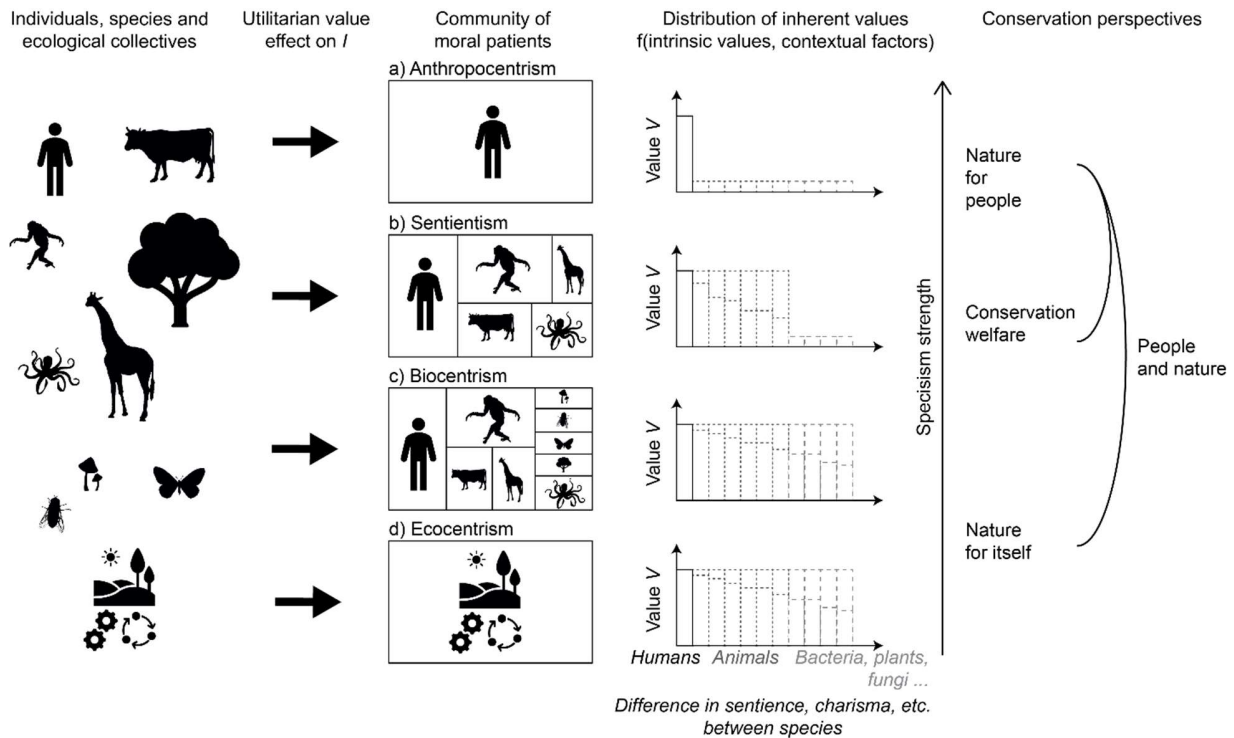

1147

1148 **Figure 1.** Differences between value systems influenced by a) anthropocentrism, b) sentientism,  
 1149 c) biocentrism and d) ecocentrism. Anthropocentrism, sentientism and biocentrism all value  
 1150 individuals intrinsically, but consider different moral communities, i.e. their values depend on the  
 1151 category of species they belong to, with  $\{\text{humans}\} \in \{\text{sentient beings}\} \in \{\text{all living organisms}\}$ .  
 1152 The intrinsic value, in combination with contextual factors, defines the inherent value of an  
 1153 individual. Ecocentrism, in contrast, is not based on individuals, but on ecological collectives,  
 1154 i.e. on species or on species assemblages and ecosystems. Species outside of the moral  
 1155 community may have a utilitarian value for species in the moral community (represented by the  
 1156 arrows), which will be reflected by changes in the impact variable. Note that species can have  
 1157 both an inherent and a utilitarian value. Within the moral community, species may have equal  
 1158 inherent values, but subjective perceptions and different value systems can assign different  
 1159 values to different species. The skewness of the value distribution then indicates the degree or  
 1160 strength of speciesism with respect to the species of reference, assumed here to be the human  
 1161 species, and is influenced by many factors, including charisma, cultural context, etc. Different  
 1162 value systems (or combination of) correspond to different conservation perspectives.
